# Supplementary material for: Real-time analysis of the diphtheria outbreak in forcibly displaced Myanmar nationals in Bangladesh
Source: BMC Med. 2019 Mar 12;17:58. doi: 10.1186/s12916-019-1288-7 (PMC6413455; doi:10.1186/s12916-019-1288-7)
Supplement: Supplementary file 2 — Incidence data - The unadjusted incidence data extracted from line lists and used for this analysis. (CSV 642 kb) [file 12916_2019_1288_MOESM2_ESM.csv]

date_line_list	date_symptoms	camp	age_group	incidence
2017-12-09	2017-11-08	Balukhali	0-4	0
2017-12-09	2017-11-08	Balukhali	5-14	0
2017-12-09	2017-11-08	Balukhali	15+	1
2017-12-09	2017-11-08	Kutupalong	0-4	0
2017-12-09	2017-11-08	Kutupalong	5-14	0
2017-12-09	2017-11-08	Kutupalong	15+	0
2017-12-09	2017-11-08	other	0-4	0
2017-12-09	2017-11-08	other	5-14	0
2017-12-09	2017-11-08	other	15+	0
2017-12-09	2017-11-09	Balukhali	0-4	0
2017-12-09	2017-11-09	Balukhali	5-14	0
2017-12-09	2017-11-09	Balukhali	15+	0
2017-12-09	2017-11-09	Kutupalong	0-4	0
2017-12-09	2017-11-09	Kutupalong	5-14	0
2017-12-09	2017-11-09	Kutupalong	15+	0
2017-12-09	2017-11-09	other	0-4	0
2017-12-09	2017-11-09	other	5-14	0
2017-12-09	2017-11-09	other	15+	0
2017-12-09	2017-11-10	Balukhali	0-4	0
2017-12-09	2017-11-10	Balukhali	5-14	0
2017-12-09	2017-11-10	Balukhali	15+	0
2017-12-09	2017-11-10	Kutupalong	0-4	0
2017-12-09	2017-11-10	Kutupalong	5-14	0
2017-12-09	2017-11-10	Kutupalong	15+	0
2017-12-09	2017-11-10	other	0-4	0
2017-12-09	2017-11-10	other	5-14	0
2017-12-09	2017-11-10	other	15+	0
2017-12-09	2017-11-11	Balukhali	0-4	0
2017-12-09	2017-11-11	Balukhali	5-14	0
2017-12-09	2017-11-11	Balukhali	15+	0
2017-12-09	2017-11-11	Kutupalong	0-4	0
2017-12-09	2017-11-11	Kutupalong	5-14	0
2017-12-09	2017-11-11	Kutupalong	15+	0
2017-12-09	2017-11-11	other	0-4	0
2017-12-09	2017-11-11	other	5-14	0
2017-12-09	2017-11-11	other	15+	0
2017-12-09	2017-11-12	Balukhali	0-4	0
2017-12-09	2017-11-12	Balukhali	5-14	0
2017-12-09	2017-11-12	Balukhali	15+	0
2017-12-09	2017-11-12	Kutupalong	0-4	0
2017-12-09	2017-11-12	Kutupalong	5-14	1
2017-12-09	2017-11-12	Kutupalong	15+	0
2017-12-09	2017-11-12	other	0-4	0
2017-12-09	2017-11-12	other	5-14	0
2017-12-09	2017-11-12	other	15+	0
2017-12-09	2017-11-13	Balukhali	0-4	0
2017-12-09	2017-11-13	Balukhali	5-14	0
2017-12-09	2017-11-13	Balukhali	15+	0
2017-12-09	2017-11-13	Kutupalong	0-4	0
2017-12-09	2017-11-13	Kutupalong	5-14	0
2017-12-09	2017-11-13	Kutupalong	15+	0
2017-12-09	2017-11-13	other	0-4	0
2017-12-09	2017-11-13	other	5-14	0
2017-12-09	2017-11-13	other	15+	0
2017-12-09	2017-11-14	Balukhali	0-4	0
2017-12-09	2017-11-14	Balukhali	5-14	0
2017-12-09	2017-11-14	Balukhali	15+	0
2017-12-09	2017-11-14	Kutupalong	0-4	0
2017-12-09	2017-11-14	Kutupalong	5-14	0
2017-12-09	2017-11-14	Kutupalong	15+	0
2017-12-09	2017-11-14	other	0-4	0
2017-12-09	2017-11-14	other	5-14	0
2017-12-09	2017-11-14	other	15+	0
2017-12-09	2017-11-15	Balukhali	0-4	0
2017-12-09	2017-11-15	Balukhali	5-14	0
2017-12-09	2017-11-15	Balukhali	15+	0
2017-12-09	2017-11-15	Kutupalong	0-4	0
2017-12-09	2017-11-15	Kutupalong	5-14	1
2017-12-09	2017-11-15	Kutupalong	15+	0
2017-12-09	2017-11-15	other	0-4	0
2017-12-09	2017-11-15	other	5-14	0
2017-12-09	2017-11-15	other	15+	0
2017-12-09	2017-11-16	Balukhali	0-4	1
2017-12-09	2017-11-16	Balukhali	5-14	0
2017-12-09	2017-11-16	Balukhali	15+	0
2017-12-09	2017-11-16	Kutupalong	0-4	0
2017-12-09	2017-11-16	Kutupalong	5-14	0
2017-12-09	2017-11-16	Kutupalong	15+	0
2017-12-09	2017-11-16	other	0-4	0
2017-12-09	2017-11-16	other	5-14	0
2017-12-09	2017-11-16	other	15+	0
2017-12-09	2017-11-17	Balukhali	0-4	0
2017-12-09	2017-11-17	Balukhali	5-14	0
2017-12-09	2017-11-17	Balukhali	15+	0
2017-12-09	2017-11-17	Kutupalong	0-4	0
2017-12-09	2017-11-17	Kutupalong	5-14	0
2017-12-09	2017-11-17	Kutupalong	15+	0
2017-12-09	2017-11-17	other	0-4	0
2017-12-09	2017-11-17	other	5-14	0
2017-12-09	2017-11-17	other	15+	0
2017-12-09	2017-11-18	Balukhali	0-4	0
2017-12-09	2017-11-18	Balukhali	5-14	0
2017-12-09	2017-11-18	Balukhali	15+	0
2017-12-09	2017-11-18	Kutupalong	0-4	0
2017-12-09	2017-11-18	Kutupalong	5-14	0
2017-12-09	2017-11-18	Kutupalong	15+	0
2017-12-09	2017-11-18	other	0-4	0
2017-12-09	2017-11-18	other	5-14	0
2017-12-09	2017-11-18	other	15+	0
2017-12-09	2017-11-19	Balukhali	0-4	0
2017-12-09	2017-11-19	Balukhali	5-14	0
2017-12-09	2017-11-19	Balukhali	15+	0
2017-12-09	2017-11-19	Kutupalong	0-4	0
2017-12-09	2017-11-19	Kutupalong	5-14	0
2017-12-09	2017-11-19	Kutupalong	15+	0
2017-12-09	2017-11-19	other	0-4	0
2017-12-09	2017-11-19	other	5-14	0
2017-12-09	2017-11-19	other	15+	0
2017-12-09	2017-11-20	Balukhali	0-4	1
2017-12-09	2017-11-20	Balukhali	5-14	0
2017-12-09	2017-11-20	Balukhali	15+	2
2017-12-09	2017-11-20	Kutupalong	0-4	0
2017-12-09	2017-11-20	Kutupalong	5-14	0
2017-12-09	2017-11-20	Kutupalong	15+	0
2017-12-09	2017-11-20	other	0-4	0
2017-12-09	2017-11-20	other	5-14	0
2017-12-09	2017-11-20	other	15+	0
2017-12-09	2017-11-21	Balukhali	0-4	0
2017-12-09	2017-11-21	Balukhali	5-14	0
2017-12-09	2017-11-21	Balukhali	15+	0
2017-12-09	2017-11-21	Kutupalong	0-4	0
2017-12-09	2017-11-21	Kutupalong	5-14	0
2017-12-09	2017-11-21	Kutupalong	15+	0
2017-12-09	2017-11-21	other	0-4	0
2017-12-09	2017-11-21	other	5-14	0
2017-12-09	2017-11-21	other	15+	0
2017-12-09	2017-11-22	Balukhali	0-4	0
2017-12-09	2017-11-22	Balukhali	5-14	1
2017-12-09	2017-11-22	Balukhali	15+	0
2017-12-09	2017-11-22	Kutupalong	0-4	0
2017-12-09	2017-11-22	Kutupalong	5-14	0
2017-12-09	2017-11-22	Kutupalong	15+	0
2017-12-09	2017-11-22	other	0-4	0
2017-12-09	2017-11-22	other	5-14	0
2017-12-09	2017-11-22	other	15+	0
2017-12-09	2017-11-23	Balukhali	0-4	0
2017-12-09	2017-11-23	Balukhali	5-14	1
2017-12-09	2017-11-23	Balukhali	15+	0
2017-12-09	2017-11-23	Kutupalong	0-4	0
2017-12-09	2017-11-23	Kutupalong	5-14	0
2017-12-09	2017-11-23	Kutupalong	15+	0
2017-12-09	2017-11-23	other	0-4	0
2017-12-09	2017-11-23	other	5-14	2
2017-12-09	2017-11-23	other	15+	0
2017-12-09	2017-11-24	Balukhali	0-4	0
2017-12-09	2017-11-24	Balukhali	5-14	0
2017-12-09	2017-11-24	Balukhali	15+	1
2017-12-09	2017-11-24	Kutupalong	0-4	0
2017-12-09	2017-11-24	Kutupalong	5-14	0
2017-12-09	2017-11-24	Kutupalong	15+	0
2017-12-09	2017-11-24	other	0-4	0
2017-12-09	2017-11-24	other	5-14	0
2017-12-09	2017-11-24	other	15+	1
2017-12-09	2017-11-25	Balukhali	0-4	0
2017-12-09	2017-11-25	Balukhali	5-14	3
2017-12-09	2017-11-25	Balukhali	15+	0
2017-12-09	2017-11-25	Kutupalong	0-4	0
2017-12-09	2017-11-25	Kutupalong	5-14	1
2017-12-09	2017-11-25	Kutupalong	15+	0
2017-12-09	2017-11-25	other	0-4	0
2017-12-09	2017-11-25	other	5-14	2
2017-12-09	2017-11-25	other	15+	0
2017-12-09	2017-11-26	Balukhali	0-4	2
2017-12-09	2017-11-26	Balukhali	5-14	1
2017-12-09	2017-11-26	Balukhali	15+	4
2017-12-09	2017-11-26	Kutupalong	0-4	0
2017-12-09	2017-11-26	Kutupalong	5-14	0
2017-12-09	2017-11-26	Kutupalong	15+	1
2017-12-09	2017-11-26	other	0-4	0
2017-12-09	2017-11-26	other	5-14	0
2017-12-09	2017-11-26	other	15+	0
2017-12-09	2017-11-27	Balukhali	0-4	0
2017-12-09	2017-11-27	Balukhali	5-14	2
2017-12-09	2017-11-27	Balukhali	15+	1
2017-12-09	2017-11-27	Kutupalong	0-4	0
2017-12-09	2017-11-27	Kutupalong	5-14	0
2017-12-09	2017-11-27	Kutupalong	15+	0
2017-12-09	2017-11-27	other	0-4	0
2017-12-09	2017-11-27	other	5-14	0
2017-12-09	2017-11-27	other	15+	0
2017-12-09	2017-11-28	Balukhali	0-4	1
2017-12-09	2017-11-28	Balukhali	5-14	3
2017-12-09	2017-11-28	Balukhali	15+	1
2017-12-09	2017-11-28	Kutupalong	0-4	0
2017-12-09	2017-11-28	Kutupalong	5-14	1
2017-12-09	2017-11-28	Kutupalong	15+	1
2017-12-09	2017-11-28	other	0-4	0
2017-12-09	2017-11-28	other	5-14	0
2017-12-09	2017-11-28	other	15+	0
2017-12-09	2017-11-29	Balukhali	0-4	2
2017-12-09	2017-11-29	Balukhali	5-14	3
2017-12-09	2017-11-29	Balukhali	15+	2
2017-12-09	2017-11-29	Kutupalong	0-4	1
2017-12-09	2017-11-29	Kutupalong	5-14	1
2017-12-09	2017-11-29	Kutupalong	15+	0
2017-12-09	2017-11-29	other	0-4	1
2017-12-09	2017-11-29	other	5-14	0
2017-12-09	2017-11-29	other	15+	0
2017-12-09	2017-11-30	Balukhali	0-4	3
2017-12-09	2017-11-30	Balukhali	5-14	6
2017-12-09	2017-11-30	Balukhali	15+	2
2017-12-09	2017-11-30	Kutupalong	0-4	0
2017-12-09	2017-11-30	Kutupalong	5-14	2
2017-12-09	2017-11-30	Kutupalong	15+	3
2017-12-09	2017-11-30	other	0-4	1
2017-12-09	2017-11-30	other	5-14	0
2017-12-09	2017-11-30	other	15+	0
2017-12-09	2017-12-01	Balukhali	0-4	2
2017-12-09	2017-12-01	Balukhali	5-14	11
2017-12-09	2017-12-01	Balukhali	15+	11
2017-12-09	2017-12-01	Kutupalong	0-4	2
2017-12-09	2017-12-01	Kutupalong	5-14	0
2017-12-09	2017-12-01	Kutupalong	15+	0
2017-12-09	2017-12-01	other	0-4	0
2017-12-09	2017-12-01	other	5-14	0
2017-12-09	2017-12-01	other	15+	0
2017-12-09	2017-12-02	Balukhali	0-4	1
2017-12-09	2017-12-02	Balukhali	5-14	11
2017-12-09	2017-12-02	Balukhali	15+	8
2017-12-09	2017-12-02	Kutupalong	0-4	2
2017-12-09	2017-12-02	Kutupalong	5-14	3
2017-12-09	2017-12-02	Kutupalong	15+	1
2017-12-09	2017-12-02	other	0-4	1
2017-12-09	2017-12-02	other	5-14	0
2017-12-09	2017-12-02	other	15+	0
2017-12-09	2017-12-03	Balukhali	0-4	6
2017-12-09	2017-12-03	Balukhali	5-14	26
2017-12-09	2017-12-03	Balukhali	15+	10
2017-12-09	2017-12-03	Kutupalong	0-4	4
2017-12-09	2017-12-03	Kutupalong	5-14	8
2017-12-09	2017-12-03	Kutupalong	15+	5
2017-12-09	2017-12-03	other	0-4	0
2017-12-09	2017-12-03	other	5-14	1
2017-12-09	2017-12-03	other	15+	1
2017-12-09	2017-12-04	Balukhali	0-4	1
2017-12-09	2017-12-04	Balukhali	5-14	17
2017-12-09	2017-12-04	Balukhali	15+	7
2017-12-09	2017-12-04	Kutupalong	0-4	6
2017-12-09	2017-12-04	Kutupalong	5-14	12
2017-12-09	2017-12-04	Kutupalong	15+	1
2017-12-09	2017-12-04	other	0-4	0
2017-12-09	2017-12-04	other	5-14	4
2017-12-09	2017-12-04	other	15+	1
2017-12-09	2017-12-05	Balukhali	0-4	5
2017-12-09	2017-12-05	Balukhali	5-14	22
2017-12-09	2017-12-05	Balukhali	15+	14
2017-12-09	2017-12-05	Kutupalong	0-4	1
2017-12-09	2017-12-05	Kutupalong	5-14	6
2017-12-09	2017-12-05	Kutupalong	15+	2
2017-12-09	2017-12-05	other	0-4	1
2017-12-09	2017-12-05	other	5-14	0
2017-12-09	2017-12-05	other	15+	0
2017-12-09	2017-12-06	Balukhali	0-4	11
2017-12-09	2017-12-06	Balukhali	5-14	32
2017-12-09	2017-12-06	Balukhali	15+	13
2017-12-09	2017-12-06	Kutupalong	0-4	0
2017-12-09	2017-12-06	Kutupalong	5-14	2
2017-12-09	2017-12-06	Kutupalong	15+	0
2017-12-09	2017-12-06	other	0-4	0
2017-12-09	2017-12-06	other	5-14	1
2017-12-09	2017-12-06	other	15+	0
2017-12-09	2017-12-07	Balukhali	0-4	4
2017-12-09	2017-12-07	Balukhali	5-14	23
2017-12-09	2017-12-07	Balukhali	15+	14
2017-12-09	2017-12-07	Kutupalong	0-4	1
2017-12-09	2017-12-07	Kutupalong	5-14	2
2017-12-09	2017-12-07	Kutupalong	15+	0
2017-12-09	2017-12-07	other	0-4	0
2017-12-09	2017-12-07	other	5-14	0
2017-12-09	2017-12-07	other	15+	0
2017-12-09	2017-12-08	Balukhali	0-4	4
2017-12-09	2017-12-08	Balukhali	5-14	21
2017-12-09	2017-12-08	Balukhali	15+	12
2017-12-09	2017-12-08	Kutupalong	0-4	1
2017-12-09	2017-12-08	Kutupalong	5-14	0
2017-12-09	2017-12-08	Kutupalong	15+	0
2017-12-09	2017-12-08	other	0-4	1
2017-12-09	2017-12-08	other	5-14	0
2017-12-09	2017-12-08	other	15+	0
2017-12-09	2017-12-09	Balukhali	0-4	1
2017-12-09	2017-12-09	Balukhali	5-14	6
2017-12-09	2017-12-09	Balukhali	15+	2
2017-12-09	2017-12-09	Kutupalong	0-4	1
2017-12-09	2017-12-09	Kutupalong	5-14	0
2017-12-09	2017-12-09	Kutupalong	15+	0
2017-12-09	2017-12-09	other	0-4	0
2017-12-09	2017-12-09	other	5-14	0
2017-12-09	2017-12-09	other	15+	0
2017-12-11	2017-11-08	Balukhali	0-4	0
2017-12-11	2017-11-08	Balukhali	5-14	0
2017-12-11	2017-11-08	Balukhali	15+	1
2017-12-11	2017-11-08	Kutupalong	0-4	0
2017-12-11	2017-11-08	Kutupalong	5-14	0
2017-12-11	2017-11-08	Kutupalong	15+	0
2017-12-11	2017-11-08	other	0-4	0
2017-12-11	2017-11-08	other	5-14	0
2017-12-11	2017-11-08	other	15+	0
2017-12-11	2017-11-09	Balukhali	0-4	0
2017-12-11	2017-11-09	Balukhali	5-14	0
2017-12-11	2017-11-09	Balukhali	15+	0
2017-12-11	2017-11-09	Kutupalong	0-4	0
2017-12-11	2017-11-09	Kutupalong	5-14	0
2017-12-11	2017-11-09	Kutupalong	15+	0
2017-12-11	2017-11-09	other	0-4	0
2017-12-11	2017-11-09	other	5-14	0
2017-12-11	2017-11-09	other	15+	0
2017-12-11	2017-11-10	Balukhali	0-4	0
2017-12-11	2017-11-10	Balukhali	5-14	0
2017-12-11	2017-11-10	Balukhali	15+	0
2017-12-11	2017-11-10	Kutupalong	0-4	0
2017-12-11	2017-11-10	Kutupalong	5-14	0
2017-12-11	2017-11-10	Kutupalong	15+	0
2017-12-11	2017-11-10	other	0-4	0
2017-12-11	2017-11-10	other	5-14	0
2017-12-11	2017-11-10	other	15+	0
2017-12-11	2017-11-11	Balukhali	0-4	0
2017-12-11	2017-11-11	Balukhali	5-14	0
2017-12-11	2017-11-11	Balukhali	15+	0
2017-12-11	2017-11-11	Kutupalong	0-4	0
2017-12-11	2017-11-11	Kutupalong	5-14	0
2017-12-11	2017-11-11	Kutupalong	15+	0
2017-12-11	2017-11-11	other	0-4	0
2017-12-11	2017-11-11	other	5-14	0
2017-12-11	2017-11-11	other	15+	0
2017-12-11	2017-11-12	Balukhali	0-4	0
2017-12-11	2017-11-12	Balukhali	5-14	0
2017-12-11	2017-11-12	Balukhali	15+	0
2017-12-11	2017-11-12	Kutupalong	0-4	0
2017-12-11	2017-11-12	Kutupalong	5-14	1
2017-12-11	2017-11-12	Kutupalong	15+	0
2017-12-11	2017-11-12	other	0-4	0
2017-12-11	2017-11-12	other	5-14	0
2017-12-11	2017-11-12	other	15+	0
2017-12-11	2017-11-13	Balukhali	0-4	0
2017-12-11	2017-11-13	Balukhali	5-14	0
2017-12-11	2017-11-13	Balukhali	15+	0
2017-12-11	2017-11-13	Kutupalong	0-4	0
2017-12-11	2017-11-13	Kutupalong	5-14	0
2017-12-11	2017-11-13	Kutupalong	15+	0
2017-12-11	2017-11-13	other	0-4	0
2017-12-11	2017-11-13	other	5-14	0
2017-12-11	2017-11-13	other	15+	0
2017-12-11	2017-11-14	Balukhali	0-4	0
2017-12-11	2017-11-14	Balukhali	5-14	0
2017-12-11	2017-11-14	Balukhali	15+	0
2017-12-11	2017-11-14	Kutupalong	0-4	0
2017-12-11	2017-11-14	Kutupalong	5-14	0
2017-12-11	2017-11-14	Kutupalong	15+	0
2017-12-11	2017-11-14	other	0-4	0
2017-12-11	2017-11-14	other	5-14	0
2017-12-11	2017-11-14	other	15+	0
2017-12-11	2017-11-15	Balukhali	0-4	0
2017-12-11	2017-11-15	Balukhali	5-14	0
2017-12-11	2017-11-15	Balukhali	15+	0
2017-12-11	2017-11-15	Kutupalong	0-4	0
2017-12-11	2017-11-15	Kutupalong	5-14	1
2017-12-11	2017-11-15	Kutupalong	15+	0
2017-12-11	2017-11-15	other	0-4	0
2017-12-11	2017-11-15	other	5-14	0
2017-12-11	2017-11-15	other	15+	0
2017-12-11	2017-11-16	Balukhali	0-4	1
2017-12-11	2017-11-16	Balukhali	5-14	0
2017-12-11	2017-11-16	Balukhali	15+	0
2017-12-11	2017-11-16	Kutupalong	0-4	0
2017-12-11	2017-11-16	Kutupalong	5-14	0
2017-12-11	2017-11-16	Kutupalong	15+	0
2017-12-11	2017-11-16	other	0-4	0
2017-12-11	2017-11-16	other	5-14	0
2017-12-11	2017-11-16	other	15+	0
2017-12-11	2017-11-17	Balukhali	0-4	0
2017-12-11	2017-11-17	Balukhali	5-14	0
2017-12-11	2017-11-17	Balukhali	15+	0
2017-12-11	2017-11-17	Kutupalong	0-4	0
2017-12-11	2017-11-17	Kutupalong	5-14	0
2017-12-11	2017-11-17	Kutupalong	15+	0
2017-12-11	2017-11-17	other	0-4	0
2017-12-11	2017-11-17	other	5-14	0
2017-12-11	2017-11-17	other	15+	0
2017-12-11	2017-11-18	Balukhali	0-4	0
2017-12-11	2017-11-18	Balukhali	5-14	0
2017-12-11	2017-11-18	Balukhali	15+	0
2017-12-11	2017-11-18	Kutupalong	0-4	0
2017-12-11	2017-11-18	Kutupalong	5-14	0
2017-12-11	2017-11-18	Kutupalong	15+	0
2017-12-11	2017-11-18	other	0-4	0
2017-12-11	2017-11-18	other	5-14	0
2017-12-11	2017-11-18	other	15+	0
2017-12-11	2017-11-19	Balukhali	0-4	0
2017-12-11	2017-11-19	Balukhali	5-14	0
2017-12-11	2017-11-19	Balukhali	15+	0
2017-12-11	2017-11-19	Kutupalong	0-4	0
2017-12-11	2017-11-19	Kutupalong	5-14	0
2017-12-11	2017-11-19	Kutupalong	15+	0
2017-12-11	2017-11-19	other	0-4	0
2017-12-11	2017-11-19	other	5-14	0
2017-12-11	2017-11-19	other	15+	0
2017-12-11	2017-11-20	Balukhali	0-4	1
2017-12-11	2017-11-20	Balukhali	5-14	0
2017-12-11	2017-11-20	Balukhali	15+	2
2017-12-11	2017-11-20	Kutupalong	0-4	0
2017-12-11	2017-11-20	Kutupalong	5-14	0
2017-12-11	2017-11-20	Kutupalong	15+	0
2017-12-11	2017-11-20	other	0-4	0
2017-12-11	2017-11-20	other	5-14	0
2017-12-11	2017-11-20	other	15+	0
2017-12-11	2017-11-21	Balukhali	0-4	0
2017-12-11	2017-11-21	Balukhali	5-14	0
2017-12-11	2017-11-21	Balukhali	15+	0
2017-12-11	2017-11-21	Kutupalong	0-4	0
2017-12-11	2017-11-21	Kutupalong	5-14	0
2017-12-11	2017-11-21	Kutupalong	15+	0
2017-12-11	2017-11-21	other	0-4	0
2017-12-11	2017-11-21	other	5-14	0
2017-12-11	2017-11-21	other	15+	0
2017-12-11	2017-11-22	Balukhali	0-4	0
2017-12-11	2017-11-22	Balukhali	5-14	1
2017-12-11	2017-11-22	Balukhali	15+	0
2017-12-11	2017-11-22	Kutupalong	0-4	0
2017-12-11	2017-11-22	Kutupalong	5-14	0
2017-12-11	2017-11-22	Kutupalong	15+	0
2017-12-11	2017-11-22	other	0-4	0
2017-12-11	2017-11-22	other	5-14	0
2017-12-11	2017-11-22	other	15+	0
2017-12-11	2017-11-23	Balukhali	0-4	0
2017-12-11	2017-11-23	Balukhali	5-14	1
2017-12-11	2017-11-23	Balukhali	15+	0
2017-12-11	2017-11-23	Kutupalong	0-4	0
2017-12-11	2017-11-23	Kutupalong	5-14	0
2017-12-11	2017-11-23	Kutupalong	15+	0
2017-12-11	2017-11-23	other	0-4	0
2017-12-11	2017-11-23	other	5-14	2
2017-12-11	2017-11-23	other	15+	0
2017-12-11	2017-11-24	Balukhali	0-4	0
2017-12-11	2017-11-24	Balukhali	5-14	0
2017-12-11	2017-11-24	Balukhali	15+	1
2017-12-11	2017-11-24	Kutupalong	0-4	0
2017-12-11	2017-11-24	Kutupalong	5-14	0
2017-12-11	2017-11-24	Kutupalong	15+	0
2017-12-11	2017-11-24	other	0-4	0
2017-12-11	2017-11-24	other	5-14	0
2017-12-11	2017-11-24	other	15+	1
2017-12-11	2017-11-25	Balukhali	0-4	0
2017-12-11	2017-11-25	Balukhali	5-14	3
2017-12-11	2017-11-25	Balukhali	15+	1
2017-12-11	2017-11-25	Kutupalong	0-4	0
2017-12-11	2017-11-25	Kutupalong	5-14	1
2017-12-11	2017-11-25	Kutupalong	15+	0
2017-12-11	2017-11-25	other	0-4	0
2017-12-11	2017-11-25	other	5-14	2
2017-12-11	2017-11-25	other	15+	0
2017-12-11	2017-11-26	Balukhali	0-4	2
2017-12-11	2017-11-26	Balukhali	5-14	1
2017-12-11	2017-11-26	Balukhali	15+	4
2017-12-11	2017-11-26	Kutupalong	0-4	0
2017-12-11	2017-11-26	Kutupalong	5-14	0
2017-12-11	2017-11-26	Kutupalong	15+	1
2017-12-11	2017-11-26	other	0-4	0
2017-12-11	2017-11-26	other	5-14	0
2017-12-11	2017-11-26	other	15+	0
2017-12-11	2017-11-27	Balukhali	0-4	0
2017-12-11	2017-11-27	Balukhali	5-14	2
2017-12-11	2017-11-27	Balukhali	15+	1
2017-12-11	2017-11-27	Kutupalong	0-4	0
2017-12-11	2017-11-27	Kutupalong	5-14	0
2017-12-11	2017-11-27	Kutupalong	15+	0
2017-12-11	2017-11-27	other	0-4	0
2017-12-11	2017-11-27	other	5-14	0
2017-12-11	2017-11-27	other	15+	0
2017-12-11	2017-11-28	Balukhali	0-4	1
2017-12-11	2017-11-28	Balukhali	5-14	3
2017-12-11	2017-11-28	Balukhali	15+	1
2017-12-11	2017-11-28	Kutupalong	0-4	0
2017-12-11	2017-11-28	Kutupalong	5-14	1
2017-12-11	2017-11-28	Kutupalong	15+	1
2017-12-11	2017-11-28	other	0-4	0
2017-12-11	2017-11-28	other	5-14	0
2017-12-11	2017-11-28	other	15+	0
2017-12-11	2017-11-29	Balukhali	0-4	2
2017-12-11	2017-11-29	Balukhali	5-14	3
2017-12-11	2017-11-29	Balukhali	15+	2
2017-12-11	2017-11-29	Kutupalong	0-4	1
2017-12-11	2017-11-29	Kutupalong	5-14	1
2017-12-11	2017-11-29	Kutupalong	15+	0
2017-12-11	2017-11-29	other	0-4	1
2017-12-11	2017-11-29	other	5-14	0
2017-12-11	2017-11-29	other	15+	0
2017-12-11	2017-11-30	Balukhali	0-4	3
2017-12-11	2017-11-30	Balukhali	5-14	6
2017-12-11	2017-11-30	Balukhali	15+	2
2017-12-11	2017-11-30	Kutupalong	0-4	0
2017-12-11	2017-11-30	Kutupalong	5-14	2
2017-12-11	2017-11-30	Kutupalong	15+	3
2017-12-11	2017-11-30	other	0-4	1
2017-12-11	2017-11-30	other	5-14	1
2017-12-11	2017-11-30	other	15+	0
2017-12-11	2017-12-01	Balukhali	0-4	2
2017-12-11	2017-12-01	Balukhali	5-14	9
2017-12-11	2017-12-01	Balukhali	15+	11
2017-12-11	2017-12-01	Kutupalong	0-4	3
2017-12-11	2017-12-01	Kutupalong	5-14	0
2017-12-11	2017-12-01	Kutupalong	15+	0
2017-12-11	2017-12-01	other	0-4	0
2017-12-11	2017-12-01	other	5-14	2
2017-12-11	2017-12-01	other	15+	1
2017-12-11	2017-12-02	Balukhali	0-4	2
2017-12-11	2017-12-02	Balukhali	5-14	12
2017-12-11	2017-12-02	Balukhali	15+	7
2017-12-11	2017-12-02	Kutupalong	0-4	2
2017-12-11	2017-12-02	Kutupalong	5-14	4
2017-12-11	2017-12-02	Kutupalong	15+	1
2017-12-11	2017-12-02	other	0-4	1
2017-12-11	2017-12-02	other	5-14	2
2017-12-11	2017-12-02	other	15+	1
2017-12-11	2017-12-03	Balukhali	0-4	6
2017-12-11	2017-12-03	Balukhali	5-14	28
2017-12-11	2017-12-03	Balukhali	15+	11
2017-12-11	2017-12-03	Kutupalong	0-4	5
2017-12-11	2017-12-03	Kutupalong	5-14	11
2017-12-11	2017-12-03	Kutupalong	15+	5
2017-12-11	2017-12-03	other	0-4	2
2017-12-11	2017-12-03	other	5-14	4
2017-12-11	2017-12-03	other	15+	1
2017-12-11	2017-12-04	Balukhali	0-4	1
2017-12-11	2017-12-04	Balukhali	5-14	18
2017-12-11	2017-12-04	Balukhali	15+	7
2017-12-11	2017-12-04	Kutupalong	0-4	6
2017-12-11	2017-12-04	Kutupalong	5-14	15
2017-12-11	2017-12-04	Kutupalong	15+	1
2017-12-11	2017-12-04	other	0-4	0
2017-12-11	2017-12-04	other	5-14	6
2017-12-11	2017-12-04	other	15+	1
2017-12-11	2017-12-05	Balukhali	0-4	5
2017-12-11	2017-12-05	Balukhali	5-14	25
2017-12-11	2017-12-05	Balukhali	15+	16
2017-12-11	2017-12-05	Kutupalong	0-4	2
2017-12-11	2017-12-05	Kutupalong	5-14	9
2017-12-11	2017-12-05	Kutupalong	15+	5
2017-12-11	2017-12-05	other	0-4	2
2017-12-11	2017-12-05	other	5-14	2
2017-12-11	2017-12-05	other	15+	3
2017-12-11	2017-12-06	Balukhali	0-4	11
2017-12-11	2017-12-06	Balukhali	5-14	37
2017-12-11	2017-12-06	Balukhali	15+	16
2017-12-11	2017-12-06	Kutupalong	0-4	2
2017-12-11	2017-12-06	Kutupalong	5-14	9
2017-12-11	2017-12-06	Kutupalong	15+	7
2017-12-11	2017-12-06	other	0-4	2
2017-12-11	2017-12-06	other	5-14	4
2017-12-11	2017-12-06	other	15+	1
2017-12-11	2017-12-07	Balukhali	0-4	6
2017-12-11	2017-12-07	Balukhali	5-14	36
2017-12-11	2017-12-07	Balukhali	15+	20
2017-12-11	2017-12-07	Kutupalong	0-4	4
2017-12-11	2017-12-07	Kutupalong	5-14	13
2017-12-11	2017-12-07	Kutupalong	15+	1
2017-12-11	2017-12-07	other	0-4	0
2017-12-11	2017-12-07	other	5-14	8
2017-12-11	2017-12-07	other	15+	1
2017-12-11	2017-12-08	Balukhali	0-4	5
2017-12-11	2017-12-08	Balukhali	5-14	26
2017-12-11	2017-12-08	Balukhali	15+	15
2017-12-11	2017-12-08	Kutupalong	0-4	1
2017-12-11	2017-12-08	Kutupalong	5-14	2
2017-12-11	2017-12-08	Kutupalong	15+	3
2017-12-11	2017-12-08	other	0-4	3
2017-12-11	2017-12-08	other	5-14	1
2017-12-11	2017-12-08	other	15+	1
2017-12-11	2017-12-09	Balukhali	0-4	3
2017-12-11	2017-12-09	Balukhali	5-14	10
2017-12-11	2017-12-09	Balukhali	15+	7
2017-12-11	2017-12-09	Kutupalong	0-4	1
2017-12-11	2017-12-09	Kutupalong	5-14	2
2017-12-11	2017-12-09	Kutupalong	15+	4
2017-12-11	2017-12-09	other	0-4	1
2017-12-11	2017-12-09	other	5-14	2
2017-12-11	2017-12-09	other	15+	0
2017-12-11	2017-12-10	Balukhali	0-4	0
2017-12-11	2017-12-10	Balukhali	5-14	5
2017-12-11	2017-12-10	Balukhali	15+	0
2017-12-11	2017-12-10	Kutupalong	0-4	0
2017-12-11	2017-12-10	Kutupalong	5-14	1
2017-12-11	2017-12-10	Kutupalong	15+	0
2017-12-11	2017-12-10	other	0-4	1
2017-12-11	2017-12-10	other	5-14	0
2017-12-11	2017-12-10	other	15+	0
2017-12-12	2017-11-08	Balukhali	0-4	0
2017-12-12	2017-11-08	Balukhali	5-14	0
2017-12-12	2017-11-08	Balukhali	15+	1
2017-12-12	2017-11-08	Kutupalong	0-4	0
2017-12-12	2017-11-08	Kutupalong	5-14	0
2017-12-12	2017-11-08	Kutupalong	15+	0
2017-12-12	2017-11-08	other	0-4	0
2017-12-12	2017-11-08	other	5-14	0
2017-12-12	2017-11-08	other	15+	0
2017-12-12	2017-11-09	Balukhali	0-4	0
2017-12-12	2017-11-09	Balukhali	5-14	0
2017-12-12	2017-11-09	Balukhali	15+	0
2017-12-12	2017-11-09	Kutupalong	0-4	0
2017-12-12	2017-11-09	Kutupalong	5-14	0
2017-12-12	2017-11-09	Kutupalong	15+	0
2017-12-12	2017-11-09	other	0-4	0
2017-12-12	2017-11-09	other	5-14	0
2017-12-12	2017-11-09	other	15+	0
2017-12-12	2017-11-10	Balukhali	0-4	0
2017-12-12	2017-11-10	Balukhali	5-14	0
2017-12-12	2017-11-10	Balukhali	15+	0
2017-12-12	2017-11-10	Kutupalong	0-4	0
2017-12-12	2017-11-10	Kutupalong	5-14	0
2017-12-12	2017-11-10	Kutupalong	15+	0
2017-12-12	2017-11-10	other	0-4	0
2017-12-12	2017-11-10	other	5-14	0
2017-12-12	2017-11-10	other	15+	0
2017-12-12	2017-11-11	Balukhali	0-4	0
2017-12-12	2017-11-11	Balukhali	5-14	0
2017-12-12	2017-11-11	Balukhali	15+	0
2017-12-12	2017-11-11	Kutupalong	0-4	0
2017-12-12	2017-11-11	Kutupalong	5-14	0
2017-12-12	2017-11-11	Kutupalong	15+	0
2017-12-12	2017-11-11	other	0-4	0
2017-12-12	2017-11-11	other	5-14	0
2017-12-12	2017-11-11	other	15+	0
2017-12-12	2017-11-12	Balukhali	0-4	0
2017-12-12	2017-11-12	Balukhali	5-14	0
2017-12-12	2017-11-12	Balukhali	15+	0
2017-12-12	2017-11-12	Kutupalong	0-4	0
2017-12-12	2017-11-12	Kutupalong	5-14	1
2017-12-12	2017-11-12	Kutupalong	15+	0
2017-12-12	2017-11-12	other	0-4	0
2017-12-12	2017-11-12	other	5-14	0
2017-12-12	2017-11-12	other	15+	0
2017-12-12	2017-11-13	Balukhali	0-4	0
2017-12-12	2017-11-13	Balukhali	5-14	0
2017-12-12	2017-11-13	Balukhali	15+	0
2017-12-12	2017-11-13	Kutupalong	0-4	0
2017-12-12	2017-11-13	Kutupalong	5-14	0
2017-12-12	2017-11-13	Kutupalong	15+	0
2017-12-12	2017-11-13	other	0-4	0
2017-12-12	2017-11-13	other	5-14	0
2017-12-12	2017-11-13	other	15+	0
2017-12-12	2017-11-14	Balukhali	0-4	0
2017-12-12	2017-11-14	Balukhali	5-14	0
2017-12-12	2017-11-14	Balukhali	15+	0
2017-12-12	2017-11-14	Kutupalong	0-4	0
2017-12-12	2017-11-14	Kutupalong	5-14	0
2017-12-12	2017-11-14	Kutupalong	15+	0
2017-12-12	2017-11-14	other	0-4	0
2017-12-12	2017-11-14	other	5-14	0
2017-12-12	2017-11-14	other	15+	0
2017-12-12	2017-11-15	Balukhali	0-4	0
2017-12-12	2017-11-15	Balukhali	5-14	0
2017-12-12	2017-11-15	Balukhali	15+	0
2017-12-12	2017-11-15	Kutupalong	0-4	0
2017-12-12	2017-11-15	Kutupalong	5-14	1
2017-12-12	2017-11-15	Kutupalong	15+	0
2017-12-12	2017-11-15	other	0-4	0
2017-12-12	2017-11-15	other	5-14	0
2017-12-12	2017-11-15	other	15+	0
2017-12-12	2017-11-16	Balukhali	0-4	1
2017-12-12	2017-11-16	Balukhali	5-14	0
2017-12-12	2017-11-16	Balukhali	15+	0
2017-12-12	2017-11-16	Kutupalong	0-4	0
2017-12-12	2017-11-16	Kutupalong	5-14	0
2017-12-12	2017-11-16	Kutupalong	15+	0
2017-12-12	2017-11-16	other	0-4	0
2017-12-12	2017-11-16	other	5-14	0
2017-12-12	2017-11-16	other	15+	0
2017-12-12	2017-11-17	Balukhali	0-4	0
2017-12-12	2017-11-17	Balukhali	5-14	0
2017-12-12	2017-11-17	Balukhali	15+	0
2017-12-12	2017-11-17	Kutupalong	0-4	0
2017-12-12	2017-11-17	Kutupalong	5-14	0
2017-12-12	2017-11-17	Kutupalong	15+	0
2017-12-12	2017-11-17	other	0-4	0
2017-12-12	2017-11-17	other	5-14	0
2017-12-12	2017-11-17	other	15+	0
2017-12-12	2017-11-18	Balukhali	0-4	0
2017-12-12	2017-11-18	Balukhali	5-14	0
2017-12-12	2017-11-18	Balukhali	15+	0
2017-12-12	2017-11-18	Kutupalong	0-4	0
2017-12-12	2017-11-18	Kutupalong	5-14	0
2017-12-12	2017-11-18	Kutupalong	15+	0
2017-12-12	2017-11-18	other	0-4	0
2017-12-12	2017-11-18	other	5-14	0
2017-12-12	2017-11-18	other	15+	0
2017-12-12	2017-11-19	Balukhali	0-4	0
2017-12-12	2017-11-19	Balukhali	5-14	0
2017-12-12	2017-11-19	Balukhali	15+	0
2017-12-12	2017-11-19	Kutupalong	0-4	0
2017-12-12	2017-11-19	Kutupalong	5-14	0
2017-12-12	2017-11-19	Kutupalong	15+	0
2017-12-12	2017-11-19	other	0-4	0
2017-12-12	2017-11-19	other	5-14	0
2017-12-12	2017-11-19	other	15+	0
2017-12-12	2017-11-20	Balukhali	0-4	1
2017-12-12	2017-11-20	Balukhali	5-14	0
2017-12-12	2017-11-20	Balukhali	15+	3
2017-12-12	2017-11-20	Kutupalong	0-4	0
2017-12-12	2017-11-20	Kutupalong	5-14	0
2017-12-12	2017-11-20	Kutupalong	15+	0
2017-12-12	2017-11-20	other	0-4	0
2017-12-12	2017-11-20	other	5-14	0
2017-12-12	2017-11-20	other	15+	0
2017-12-12	2017-11-21	Balukhali	0-4	0
2017-12-12	2017-11-21	Balukhali	5-14	0
2017-12-12	2017-11-21	Balukhali	15+	0
2017-12-12	2017-11-21	Kutupalong	0-4	0
2017-12-12	2017-11-21	Kutupalong	5-14	0
2017-12-12	2017-11-21	Kutupalong	15+	0
2017-12-12	2017-11-21	other	0-4	0
2017-12-12	2017-11-21	other	5-14	0
2017-12-12	2017-11-21	other	15+	0
2017-12-12	2017-11-22	Balukhali	0-4	0
2017-12-12	2017-11-22	Balukhali	5-14	1
2017-12-12	2017-11-22	Balukhali	15+	0
2017-12-12	2017-11-22	Kutupalong	0-4	0
2017-12-12	2017-11-22	Kutupalong	5-14	0
2017-12-12	2017-11-22	Kutupalong	15+	0
2017-12-12	2017-11-22	other	0-4	0
2017-12-12	2017-11-22	other	5-14	0
2017-12-12	2017-11-22	other	15+	0
2017-12-12	2017-11-23	Balukhali	0-4	0
2017-12-12	2017-11-23	Balukhali	5-14	1
2017-12-12	2017-11-23	Balukhali	15+	0
2017-12-12	2017-11-23	Kutupalong	0-4	0
2017-12-12	2017-11-23	Kutupalong	5-14	0
2017-12-12	2017-11-23	Kutupalong	15+	0
2017-12-12	2017-11-23	other	0-4	0
2017-12-12	2017-11-23	other	5-14	2
2017-12-12	2017-11-23	other	15+	0
2017-12-12	2017-11-24	Balukhali	0-4	0
2017-12-12	2017-11-24	Balukhali	5-14	0
2017-12-12	2017-11-24	Balukhali	15+	1
2017-12-12	2017-11-24	Kutupalong	0-4	0
2017-12-12	2017-11-24	Kutupalong	5-14	0
2017-12-12	2017-11-24	Kutupalong	15+	0
2017-12-12	2017-11-24	other	0-4	0
2017-12-12	2017-11-24	other	5-14	0
2017-12-12	2017-11-24	other	15+	1
2017-12-12	2017-11-25	Balukhali	0-4	0
2017-12-12	2017-11-25	Balukhali	5-14	3
2017-12-12	2017-11-25	Balukhali	15+	2
2017-12-12	2017-11-25	Kutupalong	0-4	0
2017-12-12	2017-11-25	Kutupalong	5-14	1
2017-12-12	2017-11-25	Kutupalong	15+	0
2017-12-12	2017-11-25	other	0-4	0
2017-12-12	2017-11-25	other	5-14	2
2017-12-12	2017-11-25	other	15+	0
2017-12-12	2017-11-26	Balukhali	0-4	2
2017-12-12	2017-11-26	Balukhali	5-14	1
2017-12-12	2017-11-26	Balukhali	15+	4
2017-12-12	2017-11-26	Kutupalong	0-4	0
2017-12-12	2017-11-26	Kutupalong	5-14	0
2017-12-12	2017-11-26	Kutupalong	15+	1
2017-12-12	2017-11-26	other	0-4	0
2017-12-12	2017-11-26	other	5-14	0
2017-12-12	2017-11-26	other	15+	0
2017-12-12	2017-11-27	Balukhali	0-4	0
2017-12-12	2017-11-27	Balukhali	5-14	2
2017-12-12	2017-11-27	Balukhali	15+	2
2017-12-12	2017-11-27	Kutupalong	0-4	0
2017-12-12	2017-11-27	Kutupalong	5-14	0
2017-12-12	2017-11-27	Kutupalong	15+	0
2017-12-12	2017-11-27	other	0-4	0
2017-12-12	2017-11-27	other	5-14	0
2017-12-12	2017-11-27	other	15+	0
2017-12-12	2017-11-28	Balukhali	0-4	1
2017-12-12	2017-11-28	Balukhali	5-14	3
2017-12-12	2017-11-28	Balukhali	15+	1
2017-12-12	2017-11-28	Kutupalong	0-4	0
2017-12-12	2017-11-28	Kutupalong	5-14	1
2017-12-12	2017-11-28	Kutupalong	15+	1
2017-12-12	2017-11-28	other	0-4	0
2017-12-12	2017-11-28	other	5-14	0
2017-12-12	2017-11-28	other	15+	0
2017-12-12	2017-11-29	Balukhali	0-4	2
2017-12-12	2017-11-29	Balukhali	5-14	3
2017-12-12	2017-11-29	Balukhali	15+	2
2017-12-12	2017-11-29	Kutupalong	0-4	1
2017-12-12	2017-11-29	Kutupalong	5-14	1
2017-12-12	2017-11-29	Kutupalong	15+	0
2017-12-12	2017-11-29	other	0-4	1
2017-12-12	2017-11-29	other	5-14	0
2017-12-12	2017-11-29	other	15+	0
2017-12-12	2017-11-30	Balukhali	0-4	3
2017-12-12	2017-11-30	Balukhali	5-14	6
2017-12-12	2017-11-30	Balukhali	15+	3
2017-12-12	2017-11-30	Kutupalong	0-4	0
2017-12-12	2017-11-30	Kutupalong	5-14	2
2017-12-12	2017-11-30	Kutupalong	15+	3
2017-12-12	2017-11-30	other	0-4	1
2017-12-12	2017-11-30	other	5-14	1
2017-12-12	2017-11-30	other	15+	0
2017-12-12	2017-12-01	Balukhali	0-4	2
2017-12-12	2017-12-01	Balukhali	5-14	9
2017-12-12	2017-12-01	Balukhali	15+	12
2017-12-12	2017-12-01	Kutupalong	0-4	3
2017-12-12	2017-12-01	Kutupalong	5-14	0
2017-12-12	2017-12-01	Kutupalong	15+	1
2017-12-12	2017-12-01	other	0-4	0
2017-12-12	2017-12-01	other	5-14	2
2017-12-12	2017-12-01	other	15+	1
2017-12-12	2017-12-02	Balukhali	0-4	2
2017-12-12	2017-12-02	Balukhali	5-14	12
2017-12-12	2017-12-02	Balukhali	15+	7
2017-12-12	2017-12-02	Kutupalong	0-4	3
2017-12-12	2017-12-02	Kutupalong	5-14	5
2017-12-12	2017-12-02	Kutupalong	15+	1
2017-12-12	2017-12-02	other	0-4	1
2017-12-12	2017-12-02	other	5-14	2
2017-12-12	2017-12-02	other	15+	1
2017-12-12	2017-12-03	Balukhali	0-4	6
2017-12-12	2017-12-03	Balukhali	5-14	30
2017-12-12	2017-12-03	Balukhali	15+	11
2017-12-12	2017-12-03	Kutupalong	0-4	4
2017-12-12	2017-12-03	Kutupalong	5-14	11
2017-12-12	2017-12-03	Kutupalong	15+	4
2017-12-12	2017-12-03	other	0-4	2
2017-12-12	2017-12-03	other	5-14	4
2017-12-12	2017-12-03	other	15+	1
2017-12-12	2017-12-04	Balukhali	0-4	1
2017-12-12	2017-12-04	Balukhali	5-14	18
2017-12-12	2017-12-04	Balukhali	15+	10
2017-12-12	2017-12-04	Kutupalong	0-4	6
2017-12-12	2017-12-04	Kutupalong	5-14	15
2017-12-12	2017-12-04	Kutupalong	15+	1
2017-12-12	2017-12-04	other	0-4	0
2017-12-12	2017-12-04	other	5-14	6
2017-12-12	2017-12-04	other	15+	1
2017-12-12	2017-12-05	Balukhali	0-4	6
2017-12-12	2017-12-05	Balukhali	5-14	27
2017-12-12	2017-12-05	Balukhali	15+	20
2017-12-12	2017-12-05	Kutupalong	0-4	2
2017-12-12	2017-12-05	Kutupalong	5-14	10
2017-12-12	2017-12-05	Kutupalong	15+	6
2017-12-12	2017-12-05	other	0-4	2
2017-12-12	2017-12-05	other	5-14	2
2017-12-12	2017-12-05	other	15+	3
2017-12-12	2017-12-06	Balukhali	0-4	12
2017-12-12	2017-12-06	Balukhali	5-14	38
2017-12-12	2017-12-06	Balukhali	15+	18
2017-12-12	2017-12-06	Kutupalong	0-4	2
2017-12-12	2017-12-06	Kutupalong	5-14	11
2017-12-12	2017-12-06	Kutupalong	15+	8
2017-12-12	2017-12-06	other	0-4	2
2017-12-12	2017-12-06	other	5-14	5
2017-12-12	2017-12-06	other	15+	2
2017-12-12	2017-12-07	Balukhali	0-4	6
2017-12-12	2017-12-07	Balukhali	5-14	42
2017-12-12	2017-12-07	Balukhali	15+	22
2017-12-12	2017-12-07	Kutupalong	0-4	4
2017-12-12	2017-12-07	Kutupalong	5-14	14
2017-12-12	2017-12-07	Kutupalong	15+	2
2017-12-12	2017-12-07	other	0-4	0
2017-12-12	2017-12-07	other	5-14	8
2017-12-12	2017-12-07	other	15+	1
2017-12-12	2017-12-08	Balukhali	0-4	7
2017-12-12	2017-12-08	Balukhali	5-14	30
2017-12-12	2017-12-08	Balukhali	15+	20
2017-12-12	2017-12-08	Kutupalong	0-4	3
2017-12-12	2017-12-08	Kutupalong	5-14	3
2017-12-12	2017-12-08	Kutupalong	15+	4
2017-12-12	2017-12-08	other	0-4	3
2017-12-12	2017-12-08	other	5-14	1
2017-12-12	2017-12-08	other	15+	3
2017-12-12	2017-12-09	Balukhali	0-4	8
2017-12-12	2017-12-09	Balukhali	5-14	19
2017-12-12	2017-12-09	Balukhali	15+	13
2017-12-12	2017-12-09	Kutupalong	0-4	5
2017-12-12	2017-12-09	Kutupalong	5-14	5
2017-12-12	2017-12-09	Kutupalong	15+	5
2017-12-12	2017-12-09	other	0-4	2
2017-12-12	2017-12-09	other	5-14	4
2017-12-12	2017-12-09	other	15+	0
2017-12-12	2017-12-10	Balukhali	0-4	1
2017-12-12	2017-12-10	Balukhali	5-14	19
2017-12-12	2017-12-10	Balukhali	15+	4
2017-12-12	2017-12-10	Kutupalong	0-4	0
2017-12-12	2017-12-10	Kutupalong	5-14	3
2017-12-12	2017-12-10	Kutupalong	15+	1
2017-12-12	2017-12-10	other	0-4	1
2017-12-12	2017-12-10	other	5-14	1
2017-12-12	2017-12-10	other	15+	2
2017-12-12	2017-12-11	Balukhali	0-4	3
2017-12-12	2017-12-11	Balukhali	5-14	2
2017-12-12	2017-12-11	Balukhali	15+	1
2017-12-12	2017-12-11	Kutupalong	0-4	0
2017-12-12	2017-12-11	Kutupalong	5-14	1
2017-12-12	2017-12-11	Kutupalong	15+	0
2017-12-12	2017-12-11	other	0-4	0
2017-12-12	2017-12-11	other	5-14	0
2017-12-12	2017-12-11	other	15+	0
2017-12-13	2017-11-08	Balukhali	0-4	0
2017-12-13	2017-11-08	Balukhali	5-14	0
2017-12-13	2017-11-08	Balukhali	15+	1
2017-12-13	2017-11-08	Balukhali	NA	0
2017-12-13	2017-11-08	Kutupalong	0-4	0
2017-12-13	2017-11-08	Kutupalong	5-14	0
2017-12-13	2017-11-08	Kutupalong	15+	0
2017-12-13	2017-11-08	Kutupalong	NA	0
2017-12-13	2017-11-08	other	0-4	0
2017-12-13	2017-11-08	other	5-14	0
2017-12-13	2017-11-08	other	15+	0
2017-12-13	2017-11-08	other	NA	0
2017-12-13	2017-11-09	Balukhali	0-4	0
2017-12-13	2017-11-09	Balukhali	5-14	0
2017-12-13	2017-11-09	Balukhali	15+	0
2017-12-13	2017-11-09	Balukhali	NA	0
2017-12-13	2017-11-09	Kutupalong	0-4	0
2017-12-13	2017-11-09	Kutupalong	5-14	0
2017-12-13	2017-11-09	Kutupalong	15+	0
2017-12-13	2017-11-09	Kutupalong	NA	0
2017-12-13	2017-11-09	other	0-4	0
2017-12-13	2017-11-09	other	5-14	0
2017-12-13	2017-11-09	other	15+	0
2017-12-13	2017-11-09	other	NA	0
2017-12-13	2017-11-10	Balukhali	0-4	0
2017-12-13	2017-11-10	Balukhali	5-14	0
2017-12-13	2017-11-10	Balukhali	15+	0
2017-12-13	2017-11-10	Balukhali	NA	0
2017-12-13	2017-11-10	Kutupalong	0-4	0
2017-12-13	2017-11-10	Kutupalong	5-14	0
2017-12-13	2017-11-10	Kutupalong	15+	0
2017-12-13	2017-11-10	Kutupalong	NA	0
2017-12-13	2017-11-10	other	0-4	0
2017-12-13	2017-11-10	other	5-14	0
2017-12-13	2017-11-10	other	15+	0
2017-12-13	2017-11-10	other	NA	0
2017-12-13	2017-11-11	Balukhali	0-4	0
2017-12-13	2017-11-11	Balukhali	5-14	0
2017-12-13	2017-11-11	Balukhali	15+	0
2017-12-13	2017-11-11	Balukhali	NA	0
2017-12-13	2017-11-11	Kutupalong	0-4	0
2017-12-13	2017-11-11	Kutupalong	5-14	0
2017-12-13	2017-11-11	Kutupalong	15+	0
2017-12-13	2017-11-11	Kutupalong	NA	0
2017-12-13	2017-11-11	other	0-4	0
2017-12-13	2017-11-11	other	5-14	0
2017-12-13	2017-11-11	other	15+	0
2017-12-13	2017-11-11	other	NA	0
2017-12-13	2017-11-12	Balukhali	0-4	0
2017-12-13	2017-11-12	Balukhali	5-14	0
2017-12-13	2017-11-12	Balukhali	15+	0
2017-12-13	2017-11-12	Balukhali	NA	0
2017-12-13	2017-11-12	Kutupalong	0-4	0
2017-12-13	2017-11-12	Kutupalong	5-14	1
2017-12-13	2017-11-12	Kutupalong	15+	0
2017-12-13	2017-11-12	Kutupalong	NA	0
2017-12-13	2017-11-12	other	0-4	0
2017-12-13	2017-11-12	other	5-14	0
2017-12-13	2017-11-12	other	15+	0
2017-12-13	2017-11-12	other	NA	0
2017-12-13	2017-11-13	Balukhali	0-4	0
2017-12-13	2017-11-13	Balukhali	5-14	0
2017-12-13	2017-11-13	Balukhali	15+	0
2017-12-13	2017-11-13	Balukhali	NA	0
2017-12-13	2017-11-13	Kutupalong	0-4	0
2017-12-13	2017-11-13	Kutupalong	5-14	0
2017-12-13	2017-11-13	Kutupalong	15+	0
2017-12-13	2017-11-13	Kutupalong	NA	0
2017-12-13	2017-11-13	other	0-4	0
2017-12-13	2017-11-13	other	5-14	0
2017-12-13	2017-11-13	other	15+	0
2017-12-13	2017-11-13	other	NA	0
2017-12-13	2017-11-14	Balukhali	0-4	0
2017-12-13	2017-11-14	Balukhali	5-14	0
2017-12-13	2017-11-14	Balukhali	15+	0
2017-12-13	2017-11-14	Balukhali	NA	0
2017-12-13	2017-11-14	Kutupalong	0-4	0
2017-12-13	2017-11-14	Kutupalong	5-14	0
2017-12-13	2017-11-14	Kutupalong	15+	0
2017-12-13	2017-11-14	Kutupalong	NA	0
2017-12-13	2017-11-14	other	0-4	0
2017-12-13	2017-11-14	other	5-14	0
2017-12-13	2017-11-14	other	15+	0
2017-12-13	2017-11-14	other	NA	0
2017-12-13	2017-11-15	Balukhali	0-4	0
2017-12-13	2017-11-15	Balukhali	5-14	0
2017-12-13	2017-11-15	Balukhali	15+	0
2017-12-13	2017-11-15	Balukhali	NA	0
2017-12-13	2017-11-15	Kutupalong	0-4	0
2017-12-13	2017-11-15	Kutupalong	5-14	1
2017-12-13	2017-11-15	Kutupalong	15+	0
2017-12-13	2017-11-15	Kutupalong	NA	0
2017-12-13	2017-11-15	other	0-4	0
2017-12-13	2017-11-15	other	5-14	0
2017-12-13	2017-11-15	other	15+	0
2017-12-13	2017-11-15	other	NA	0
2017-12-13	2017-11-16	Balukhali	0-4	1
2017-12-13	2017-11-16	Balukhali	5-14	0
2017-12-13	2017-11-16	Balukhali	15+	0
2017-12-13	2017-11-16	Balukhali	NA	0
2017-12-13	2017-11-16	Kutupalong	0-4	0
2017-12-13	2017-11-16	Kutupalong	5-14	0
2017-12-13	2017-11-16	Kutupalong	15+	0
2017-12-13	2017-11-16	Kutupalong	NA	0
2017-12-13	2017-11-16	other	0-4	0
2017-12-13	2017-11-16	other	5-14	0
2017-12-13	2017-11-16	other	15+	0
2017-12-13	2017-11-16	other	NA	0
2017-12-13	2017-11-17	Balukhali	0-4	0
2017-12-13	2017-11-17	Balukhali	5-14	0
2017-12-13	2017-11-17	Balukhali	15+	0
2017-12-13	2017-11-17	Balukhali	NA	0
2017-12-13	2017-11-17	Kutupalong	0-4	0
2017-12-13	2017-11-17	Kutupalong	5-14	0
2017-12-13	2017-11-17	Kutupalong	15+	0
2017-12-13	2017-11-17	Kutupalong	NA	0
2017-12-13	2017-11-17	other	0-4	0
2017-12-13	2017-11-17	other	5-14	0
2017-12-13	2017-11-17	other	15+	0
2017-12-13	2017-11-17	other	NA	0
2017-12-13	2017-11-18	Balukhali	0-4	0
2017-12-13	2017-11-18	Balukhali	5-14	0
2017-12-13	2017-11-18	Balukhali	15+	0
2017-12-13	2017-11-18	Balukhali	NA	0
2017-12-13	2017-11-18	Kutupalong	0-4	0
2017-12-13	2017-11-18	Kutupalong	5-14	0
2017-12-13	2017-11-18	Kutupalong	15+	0
2017-12-13	2017-11-18	Kutupalong	NA	0
2017-12-13	2017-11-18	other	0-4	0
2017-12-13	2017-11-18	other	5-14	0
2017-12-13	2017-11-18	other	15+	0
2017-12-13	2017-11-18	other	NA	0
2017-12-13	2017-11-19	Balukhali	0-4	0
2017-12-13	2017-11-19	Balukhali	5-14	0
2017-12-13	2017-11-19	Balukhali	15+	0
2017-12-13	2017-11-19	Balukhali	NA	0
2017-12-13	2017-11-19	Kutupalong	0-4	0
2017-12-13	2017-11-19	Kutupalong	5-14	0
2017-12-13	2017-11-19	Kutupalong	15+	0
2017-12-13	2017-11-19	Kutupalong	NA	0
2017-12-13	2017-11-19	other	0-4	0
2017-12-13	2017-11-19	other	5-14	0
2017-12-13	2017-11-19	other	15+	0
2017-12-13	2017-11-19	other	NA	0
2017-12-13	2017-11-20	Balukhali	0-4	1
2017-12-13	2017-11-20	Balukhali	5-14	0
2017-12-13	2017-11-20	Balukhali	15+	3
2017-12-13	2017-11-20	Balukhali	NA	0
2017-12-13	2017-11-20	Kutupalong	0-4	0
2017-12-13	2017-11-20	Kutupalong	5-14	0
2017-12-13	2017-11-20	Kutupalong	15+	0
2017-12-13	2017-11-20	Kutupalong	NA	0
2017-12-13	2017-11-20	other	0-4	0
2017-12-13	2017-11-20	other	5-14	0
2017-12-13	2017-11-20	other	15+	0
2017-12-13	2017-11-20	other	NA	0
2017-12-13	2017-11-21	Balukhali	0-4	0
2017-12-13	2017-11-21	Balukhali	5-14	0
2017-12-13	2017-11-21	Balukhali	15+	0
2017-12-13	2017-11-21	Balukhali	NA	0
2017-12-13	2017-11-21	Kutupalong	0-4	0
2017-12-13	2017-11-21	Kutupalong	5-14	0
2017-12-13	2017-11-21	Kutupalong	15+	0
2017-12-13	2017-11-21	Kutupalong	NA	0
2017-12-13	2017-11-21	other	0-4	0
2017-12-13	2017-11-21	other	5-14	0
2017-12-13	2017-11-21	other	15+	0
2017-12-13	2017-11-21	other	NA	0
2017-12-13	2017-11-22	Balukhali	0-4	0
2017-12-13	2017-11-22	Balukhali	5-14	1
2017-12-13	2017-11-22	Balukhali	15+	0
2017-12-13	2017-11-22	Balukhali	NA	0
2017-12-13	2017-11-22	Kutupalong	0-4	0
2017-12-13	2017-11-22	Kutupalong	5-14	0
2017-12-13	2017-11-22	Kutupalong	15+	0
2017-12-13	2017-11-22	Kutupalong	NA	0
2017-12-13	2017-11-22	other	0-4	0
2017-12-13	2017-11-22	other	5-14	0
2017-12-13	2017-11-22	other	15+	0
2017-12-13	2017-11-22	other	NA	0
2017-12-13	2017-11-23	Balukhali	0-4	0
2017-12-13	2017-11-23	Balukhali	5-14	1
2017-12-13	2017-11-23	Balukhali	15+	0
2017-12-13	2017-11-23	Balukhali	NA	0
2017-12-13	2017-11-23	Kutupalong	0-4	0
2017-12-13	2017-11-23	Kutupalong	5-14	0
2017-12-13	2017-11-23	Kutupalong	15+	0
2017-12-13	2017-11-23	Kutupalong	NA	0
2017-12-13	2017-11-23	other	0-4	0
2017-12-13	2017-11-23	other	5-14	2
2017-12-13	2017-11-23	other	15+	0
2017-12-13	2017-11-23	other	NA	0
2017-12-13	2017-11-24	Balukhali	0-4	0
2017-12-13	2017-11-24	Balukhali	5-14	0
2017-12-13	2017-11-24	Balukhali	15+	1
2017-12-13	2017-11-24	Balukhali	NA	0
2017-12-13	2017-11-24	Kutupalong	0-4	0
2017-12-13	2017-11-24	Kutupalong	5-14	0
2017-12-13	2017-11-24	Kutupalong	15+	0
2017-12-13	2017-11-24	Kutupalong	NA	0
2017-12-13	2017-11-24	other	0-4	0
2017-12-13	2017-11-24	other	5-14	0
2017-12-13	2017-11-24	other	15+	1
2017-12-13	2017-11-24	other	NA	0
2017-12-13	2017-11-25	Balukhali	0-4	0
2017-12-13	2017-11-25	Balukhali	5-14	3
2017-12-13	2017-11-25	Balukhali	15+	2
2017-12-13	2017-11-25	Balukhali	NA	0
2017-12-13	2017-11-25	Kutupalong	0-4	0
2017-12-13	2017-11-25	Kutupalong	5-14	1
2017-12-13	2017-11-25	Kutupalong	15+	0
2017-12-13	2017-11-25	Kutupalong	NA	0
2017-12-13	2017-11-25	other	0-4	0
2017-12-13	2017-11-25	other	5-14	2
2017-12-13	2017-11-25	other	15+	0
2017-12-13	2017-11-25	other	NA	0
2017-12-13	2017-11-26	Balukhali	0-4	2
2017-12-13	2017-11-26	Balukhali	5-14	1
2017-12-13	2017-11-26	Balukhali	15+	4
2017-12-13	2017-11-26	Balukhali	NA	0
2017-12-13	2017-11-26	Kutupalong	0-4	0
2017-12-13	2017-11-26	Kutupalong	5-14	0
2017-12-13	2017-11-26	Kutupalong	15+	1
2017-12-13	2017-11-26	Kutupalong	NA	0
2017-12-13	2017-11-26	other	0-4	0
2017-12-13	2017-11-26	other	5-14	0
2017-12-13	2017-11-26	other	15+	0
2017-12-13	2017-11-26	other	NA	0
2017-12-13	2017-11-27	Balukhali	0-4	0
2017-12-13	2017-11-27	Balukhali	5-14	2
2017-12-13	2017-11-27	Balukhali	15+	2
2017-12-13	2017-11-27	Balukhali	NA	0
2017-12-13	2017-11-27	Kutupalong	0-4	0
2017-12-13	2017-11-27	Kutupalong	5-14	0
2017-12-13	2017-11-27	Kutupalong	15+	0
2017-12-13	2017-11-27	Kutupalong	NA	0
2017-12-13	2017-11-27	other	0-4	0
2017-12-13	2017-11-27	other	5-14	0
2017-12-13	2017-11-27	other	15+	0
2017-12-13	2017-11-27	other	NA	0
2017-12-13	2017-11-28	Balukhali	0-4	1
2017-12-13	2017-11-28	Balukhali	5-14	3
2017-12-13	2017-11-28	Balukhali	15+	1
2017-12-13	2017-11-28	Balukhali	NA	0
2017-12-13	2017-11-28	Kutupalong	0-4	0
2017-12-13	2017-11-28	Kutupalong	5-14	1
2017-12-13	2017-11-28	Kutupalong	15+	1
2017-12-13	2017-11-28	Kutupalong	NA	0
2017-12-13	2017-11-28	other	0-4	0
2017-12-13	2017-11-28	other	5-14	0
2017-12-13	2017-11-28	other	15+	0
2017-12-13	2017-11-28	other	NA	0
2017-12-13	2017-11-29	Balukhali	0-4	2
2017-12-13	2017-11-29	Balukhali	5-14	3
2017-12-13	2017-11-29	Balukhali	15+	2
2017-12-13	2017-11-29	Balukhali	NA	0
2017-12-13	2017-11-29	Kutupalong	0-4	1
2017-12-13	2017-11-29	Kutupalong	5-14	1
2017-12-13	2017-11-29	Kutupalong	15+	0
2017-12-13	2017-11-29	Kutupalong	NA	0
2017-12-13	2017-11-29	other	0-4	1
2017-12-13	2017-11-29	other	5-14	0
2017-12-13	2017-11-29	other	15+	0
2017-12-13	2017-11-29	other	NA	0
2017-12-13	2017-11-30	Balukhali	0-4	3
2017-12-13	2017-11-30	Balukhali	5-14	6
2017-12-13	2017-11-30	Balukhali	15+	3
2017-12-13	2017-11-30	Balukhali	NA	0
2017-12-13	2017-11-30	Kutupalong	0-4	0
2017-12-13	2017-11-30	Kutupalong	5-14	2
2017-12-13	2017-11-30	Kutupalong	15+	3
2017-12-13	2017-11-30	Kutupalong	NA	0
2017-12-13	2017-11-30	other	0-4	1
2017-12-13	2017-11-30	other	5-14	1
2017-12-13	2017-11-30	other	15+	0
2017-12-13	2017-11-30	other	NA	0
2017-12-13	2017-12-01	Balukhali	0-4	2
2017-12-13	2017-12-01	Balukhali	5-14	10
2017-12-13	2017-12-01	Balukhali	15+	12
2017-12-13	2017-12-01	Balukhali	NA	0
2017-12-13	2017-12-01	Kutupalong	0-4	3
2017-12-13	2017-12-01	Kutupalong	5-14	0
2017-12-13	2017-12-01	Kutupalong	15+	1
2017-12-13	2017-12-01	Kutupalong	NA	0
2017-12-13	2017-12-01	other	0-4	0
2017-12-13	2017-12-01	other	5-14	2
2017-12-13	2017-12-01	other	15+	1
2017-12-13	2017-12-01	other	NA	0
2017-12-13	2017-12-02	Balukhali	0-4	2
2017-12-13	2017-12-02	Balukhali	5-14	12
2017-12-13	2017-12-02	Balukhali	15+	7
2017-12-13	2017-12-02	Balukhali	NA	0
2017-12-13	2017-12-02	Kutupalong	0-4	3
2017-12-13	2017-12-02	Kutupalong	5-14	5
2017-12-13	2017-12-02	Kutupalong	15+	1
2017-12-13	2017-12-02	Kutupalong	NA	0
2017-12-13	2017-12-02	other	0-4	1
2017-12-13	2017-12-02	other	5-14	2
2017-12-13	2017-12-02	other	15+	1
2017-12-13	2017-12-02	other	NA	0
2017-12-13	2017-12-03	Balukhali	0-4	6
2017-12-13	2017-12-03	Balukhali	5-14	31
2017-12-13	2017-12-03	Balukhali	15+	11
2017-12-13	2017-12-03	Balukhali	NA	0
2017-12-13	2017-12-03	Kutupalong	0-4	4
2017-12-13	2017-12-03	Kutupalong	5-14	12
2017-12-13	2017-12-03	Kutupalong	15+	4
2017-12-13	2017-12-03	Kutupalong	NA	1
2017-12-13	2017-12-03	other	0-4	2
2017-12-13	2017-12-03	other	5-14	4
2017-12-13	2017-12-03	other	15+	1
2017-12-13	2017-12-03	other	NA	0
2017-12-13	2017-12-04	Balukhali	0-4	1
2017-12-13	2017-12-04	Balukhali	5-14	18
2017-12-13	2017-12-04	Balukhali	15+	10
2017-12-13	2017-12-04	Balukhali	NA	0
2017-12-13	2017-12-04	Kutupalong	0-4	5
2017-12-13	2017-12-04	Kutupalong	5-14	15
2017-12-13	2017-12-04	Kutupalong	15+	1
2017-12-13	2017-12-04	Kutupalong	NA	0
2017-12-13	2017-12-04	other	0-4	0
2017-12-13	2017-12-04	other	5-14	6
2017-12-13	2017-12-04	other	15+	1
2017-12-13	2017-12-04	other	NA	0
2017-12-13	2017-12-05	Balukhali	0-4	6
2017-12-13	2017-12-05	Balukhali	5-14	27
2017-12-13	2017-12-05	Balukhali	15+	20
2017-12-13	2017-12-05	Balukhali	NA	0
2017-12-13	2017-12-05	Kutupalong	0-4	2
2017-12-13	2017-12-05	Kutupalong	5-14	10
2017-12-13	2017-12-05	Kutupalong	15+	6
2017-12-13	2017-12-05	Kutupalong	NA	0
2017-12-13	2017-12-05	other	0-4	2
2017-12-13	2017-12-05	other	5-14	2
2017-12-13	2017-12-05	other	15+	3
2017-12-13	2017-12-05	other	NA	0
2017-12-13	2017-12-06	Balukhali	0-4	13
2017-12-13	2017-12-06	Balukhali	5-14	40
2017-12-13	2017-12-06	Balukhali	15+	18
2017-12-13	2017-12-06	Balukhali	NA	0
2017-12-13	2017-12-06	Kutupalong	0-4	2
2017-12-13	2017-12-06	Kutupalong	5-14	12
2017-12-13	2017-12-06	Kutupalong	15+	9
2017-12-13	2017-12-06	Kutupalong	NA	0
2017-12-13	2017-12-06	other	0-4	2
2017-12-13	2017-12-06	other	5-14	7
2017-12-13	2017-12-06	other	15+	2
2017-12-13	2017-12-06	other	NA	0
2017-12-13	2017-12-07	Balukhali	0-4	7
2017-12-13	2017-12-07	Balukhali	5-14	43
2017-12-13	2017-12-07	Balukhali	15+	23
2017-12-13	2017-12-07	Balukhali	NA	0
2017-12-13	2017-12-07	Kutupalong	0-4	5
2017-12-13	2017-12-07	Kutupalong	5-14	17
2017-12-13	2017-12-07	Kutupalong	15+	3
2017-12-13	2017-12-07	Kutupalong	NA	0
2017-12-13	2017-12-07	other	0-4	1
2017-12-13	2017-12-07	other	5-14	8
2017-12-13	2017-12-07	other	15+	1
2017-12-13	2017-12-07	other	NA	0
2017-12-13	2017-12-08	Balukhali	0-4	9
2017-12-13	2017-12-08	Balukhali	5-14	31
2017-12-13	2017-12-08	Balukhali	15+	21
2017-12-13	2017-12-08	Balukhali	NA	0
2017-12-13	2017-12-08	Kutupalong	0-4	3
2017-12-13	2017-12-08	Kutupalong	5-14	6
2017-12-13	2017-12-08	Kutupalong	15+	8
2017-12-13	2017-12-08	Kutupalong	NA	0
2017-12-13	2017-12-08	other	0-4	3
2017-12-13	2017-12-08	other	5-14	1
2017-12-13	2017-12-08	other	15+	4
2017-12-13	2017-12-08	other	NA	0
2017-12-13	2017-12-09	Balukhali	0-4	9
2017-12-13	2017-12-09	Balukhali	5-14	29
2017-12-13	2017-12-09	Balukhali	15+	15
2017-12-13	2017-12-09	Balukhali	NA	1
2017-12-13	2017-12-09	Kutupalong	0-4	8
2017-12-13	2017-12-09	Kutupalong	5-14	7
2017-12-13	2017-12-09	Kutupalong	15+	7
2017-12-13	2017-12-09	Kutupalong	NA	0
2017-12-13	2017-12-09	other	0-4	3
2017-12-13	2017-12-09	other	5-14	5
2017-12-13	2017-12-09	other	15+	0
2017-12-13	2017-12-09	other	NA	0
2017-12-13	2017-12-10	Balukhali	0-4	2
2017-12-13	2017-12-10	Balukhali	5-14	28
2017-12-13	2017-12-10	Balukhali	15+	4
2017-12-13	2017-12-10	Balukhali	NA	0
2017-12-13	2017-12-10	Kutupalong	0-4	0
2017-12-13	2017-12-10	Kutupalong	5-14	4
2017-12-13	2017-12-10	Kutupalong	15+	4
2017-12-13	2017-12-10	Kutupalong	NA	0
2017-12-13	2017-12-10	other	0-4	1
2017-12-13	2017-12-10	other	5-14	2
2017-12-13	2017-12-10	other	15+	3
2017-12-13	2017-12-10	other	NA	0
2017-12-13	2017-12-11	Balukhali	0-4	3
2017-12-13	2017-12-11	Balukhali	5-14	10
2017-12-13	2017-12-11	Balukhali	15+	2
2017-12-13	2017-12-11	Balukhali	NA	0
2017-12-13	2017-12-11	Kutupalong	0-4	0
2017-12-13	2017-12-11	Kutupalong	5-14	2
2017-12-13	2017-12-11	Kutupalong	15+	0
2017-12-13	2017-12-11	Kutupalong	NA	0
2017-12-13	2017-12-11	other	0-4	0
2017-12-13	2017-12-11	other	5-14	0
2017-12-13	2017-12-11	other	15+	1
2017-12-13	2017-12-11	other	NA	0
2017-12-13	2017-12-12	Balukhali	0-4	0
2017-12-13	2017-12-12	Balukhali	5-14	1
2017-12-13	2017-12-12	Balukhali	15+	1
2017-12-13	2017-12-12	Balukhali	NA	0
2017-12-13	2017-12-12	Kutupalong	0-4	0
2017-12-13	2017-12-12	Kutupalong	5-14	0
2017-12-13	2017-12-12	Kutupalong	15+	0
2017-12-13	2017-12-12	Kutupalong	NA	0
2017-12-13	2017-12-12	other	0-4	0
2017-12-13	2017-12-12	other	5-14	0
2017-12-13	2017-12-12	other	15+	0
2017-12-13	2017-12-12	other	NA	0
2017-12-14	2017-11-08	Balukhali	0-4	0
2017-12-14	2017-11-08	Balukhali	5-14	0
2017-12-14	2017-11-08	Balukhali	15+	1
2017-12-14	2017-11-08	Balukhali	NA	0
2017-12-14	2017-11-08	Kutupalong	0-4	0
2017-12-14	2017-11-08	Kutupalong	5-14	0
2017-12-14	2017-11-08	Kutupalong	15+	0
2017-12-14	2017-11-08	Kutupalong	NA	0
2017-12-14	2017-11-08	other	0-4	0
2017-12-14	2017-11-08	other	5-14	0
2017-12-14	2017-11-08	other	15+	0
2017-12-14	2017-11-08	other	NA	0
2017-12-14	2017-11-09	Balukhali	0-4	0
2017-12-14	2017-11-09	Balukhali	5-14	0
2017-12-14	2017-11-09	Balukhali	15+	0
2017-12-14	2017-11-09	Balukhali	NA	0
2017-12-14	2017-11-09	Kutupalong	0-4	0
2017-12-14	2017-11-09	Kutupalong	5-14	0
2017-12-14	2017-11-09	Kutupalong	15+	0
2017-12-14	2017-11-09	Kutupalong	NA	0
2017-12-14	2017-11-09	other	0-4	0
2017-12-14	2017-11-09	other	5-14	0
2017-12-14	2017-11-09	other	15+	0
2017-12-14	2017-11-09	other	NA	0
2017-12-14	2017-11-10	Balukhali	0-4	0
2017-12-14	2017-11-10	Balukhali	5-14	0
2017-12-14	2017-11-10	Balukhali	15+	0
2017-12-14	2017-11-10	Balukhali	NA	0
2017-12-14	2017-11-10	Kutupalong	0-4	0
2017-12-14	2017-11-10	Kutupalong	5-14	0
2017-12-14	2017-11-10	Kutupalong	15+	0
2017-12-14	2017-11-10	Kutupalong	NA	0
2017-12-14	2017-11-10	other	0-4	0
2017-12-14	2017-11-10	other	5-14	0
2017-12-14	2017-11-10	other	15+	0
2017-12-14	2017-11-10	other	NA	0
2017-12-14	2017-11-11	Balukhali	0-4	0
2017-12-14	2017-11-11	Balukhali	5-14	0
2017-12-14	2017-11-11	Balukhali	15+	0
2017-12-14	2017-11-11	Balukhali	NA	0
2017-12-14	2017-11-11	Kutupalong	0-4	0
2017-12-14	2017-11-11	Kutupalong	5-14	0
2017-12-14	2017-11-11	Kutupalong	15+	0
2017-12-14	2017-11-11	Kutupalong	NA	0
2017-12-14	2017-11-11	other	0-4	0
2017-12-14	2017-11-11	other	5-14	0
2017-12-14	2017-11-11	other	15+	0
2017-12-14	2017-11-11	other	NA	0
2017-12-14	2017-11-12	Balukhali	0-4	0
2017-12-14	2017-11-12	Balukhali	5-14	0
2017-12-14	2017-11-12	Balukhali	15+	0
2017-12-14	2017-11-12	Balukhali	NA	0
2017-12-14	2017-11-12	Kutupalong	0-4	0
2017-12-14	2017-11-12	Kutupalong	5-14	1
2017-12-14	2017-11-12	Kutupalong	15+	0
2017-12-14	2017-11-12	Kutupalong	NA	0
2017-12-14	2017-11-12	other	0-4	0
2017-12-14	2017-11-12	other	5-14	0
2017-12-14	2017-11-12	other	15+	0
2017-12-14	2017-11-12	other	NA	0
2017-12-14	2017-11-13	Balukhali	0-4	0
2017-12-14	2017-11-13	Balukhali	5-14	0
2017-12-14	2017-11-13	Balukhali	15+	0
2017-12-14	2017-11-13	Balukhali	NA	0
2017-12-14	2017-11-13	Kutupalong	0-4	0
2017-12-14	2017-11-13	Kutupalong	5-14	0
2017-12-14	2017-11-13	Kutupalong	15+	0
2017-12-14	2017-11-13	Kutupalong	NA	0
2017-12-14	2017-11-13	other	0-4	0
2017-12-14	2017-11-13	other	5-14	0
2017-12-14	2017-11-13	other	15+	0
2017-12-14	2017-11-13	other	NA	0
2017-12-14	2017-11-14	Balukhali	0-4	0
2017-12-14	2017-11-14	Balukhali	5-14	0
2017-12-14	2017-11-14	Balukhali	15+	0
2017-12-14	2017-11-14	Balukhali	NA	0
2017-12-14	2017-11-14	Kutupalong	0-4	0
2017-12-14	2017-11-14	Kutupalong	5-14	0
2017-12-14	2017-11-14	Kutupalong	15+	0
2017-12-14	2017-11-14	Kutupalong	NA	0
2017-12-14	2017-11-14	other	0-4	0
2017-12-14	2017-11-14	other	5-14	0
2017-12-14	2017-11-14	other	15+	0
2017-12-14	2017-11-14	other	NA	0
2017-12-14	2017-11-15	Balukhali	0-4	0
2017-12-14	2017-11-15	Balukhali	5-14	0
2017-12-14	2017-11-15	Balukhali	15+	0
2017-12-14	2017-11-15	Balukhali	NA	0
2017-12-14	2017-11-15	Kutupalong	0-4	0
2017-12-14	2017-11-15	Kutupalong	5-14	1
2017-12-14	2017-11-15	Kutupalong	15+	0
2017-12-14	2017-11-15	Kutupalong	NA	0
2017-12-14	2017-11-15	other	0-4	0
2017-12-14	2017-11-15	other	5-14	0
2017-12-14	2017-11-15	other	15+	0
2017-12-14	2017-11-15	other	NA	0
2017-12-14	2017-11-16	Balukhali	0-4	1
2017-12-14	2017-11-16	Balukhali	5-14	0
2017-12-14	2017-11-16	Balukhali	15+	0
2017-12-14	2017-11-16	Balukhali	NA	0
2017-12-14	2017-11-16	Kutupalong	0-4	0
2017-12-14	2017-11-16	Kutupalong	5-14	0
2017-12-14	2017-11-16	Kutupalong	15+	0
2017-12-14	2017-11-16	Kutupalong	NA	0
2017-12-14	2017-11-16	other	0-4	0
2017-12-14	2017-11-16	other	5-14	0
2017-12-14	2017-11-16	other	15+	0
2017-12-14	2017-11-16	other	NA	0
2017-12-14	2017-11-17	Balukhali	0-4	0
2017-12-14	2017-11-17	Balukhali	5-14	0
2017-12-14	2017-11-17	Balukhali	15+	0
2017-12-14	2017-11-17	Balukhali	NA	0
2017-12-14	2017-11-17	Kutupalong	0-4	0
2017-12-14	2017-11-17	Kutupalong	5-14	0
2017-12-14	2017-11-17	Kutupalong	15+	0
2017-12-14	2017-11-17	Kutupalong	NA	0
2017-12-14	2017-11-17	other	0-4	0
2017-12-14	2017-11-17	other	5-14	0
2017-12-14	2017-11-17	other	15+	0
2017-12-14	2017-11-17	other	NA	0
2017-12-14	2017-11-18	Balukhali	0-4	0
2017-12-14	2017-11-18	Balukhali	5-14	0
2017-12-14	2017-11-18	Balukhali	15+	0
2017-12-14	2017-11-18	Balukhali	NA	0
2017-12-14	2017-11-18	Kutupalong	0-4	0
2017-12-14	2017-11-18	Kutupalong	5-14	0
2017-12-14	2017-11-18	Kutupalong	15+	0
2017-12-14	2017-11-18	Kutupalong	NA	0
2017-12-14	2017-11-18	other	0-4	0
2017-12-14	2017-11-18	other	5-14	0
2017-12-14	2017-11-18	other	15+	0
2017-12-14	2017-11-18	other	NA	0
2017-12-14	2017-11-19	Balukhali	0-4	0
2017-12-14	2017-11-19	Balukhali	5-14	0
2017-12-14	2017-11-19	Balukhali	15+	0
2017-12-14	2017-11-19	Balukhali	NA	0
2017-12-14	2017-11-19	Kutupalong	0-4	0
2017-12-14	2017-11-19	Kutupalong	5-14	0
2017-12-14	2017-11-19	Kutupalong	15+	0
2017-12-14	2017-11-19	Kutupalong	NA	0
2017-12-14	2017-11-19	other	0-4	0
2017-12-14	2017-11-19	other	5-14	0
2017-12-14	2017-11-19	other	15+	0
2017-12-14	2017-11-19	other	NA	0
2017-12-14	2017-11-20	Balukhali	0-4	1
2017-12-14	2017-11-20	Balukhali	5-14	0
2017-12-14	2017-11-20	Balukhali	15+	3
2017-12-14	2017-11-20	Balukhali	NA	0
2017-12-14	2017-11-20	Kutupalong	0-4	0
2017-12-14	2017-11-20	Kutupalong	5-14	0
2017-12-14	2017-11-20	Kutupalong	15+	0
2017-12-14	2017-11-20	Kutupalong	NA	0
2017-12-14	2017-11-20	other	0-4	0
2017-12-14	2017-11-20	other	5-14	0
2017-12-14	2017-11-20	other	15+	0
2017-12-14	2017-11-20	other	NA	0
2017-12-14	2017-11-21	Balukhali	0-4	0
2017-12-14	2017-11-21	Balukhali	5-14	0
2017-12-14	2017-11-21	Balukhali	15+	0
2017-12-14	2017-11-21	Balukhali	NA	0
2017-12-14	2017-11-21	Kutupalong	0-4	0
2017-12-14	2017-11-21	Kutupalong	5-14	0
2017-12-14	2017-11-21	Kutupalong	15+	0
2017-12-14	2017-11-21	Kutupalong	NA	0
2017-12-14	2017-11-21	other	0-4	0
2017-12-14	2017-11-21	other	5-14	0
2017-12-14	2017-11-21	other	15+	0
2017-12-14	2017-11-21	other	NA	0
2017-12-14	2017-11-22	Balukhali	0-4	0
2017-12-14	2017-11-22	Balukhali	5-14	1
2017-12-14	2017-11-22	Balukhali	15+	0
2017-12-14	2017-11-22	Balukhali	NA	0
2017-12-14	2017-11-22	Kutupalong	0-4	0
2017-12-14	2017-11-22	Kutupalong	5-14	0
2017-12-14	2017-11-22	Kutupalong	15+	0
2017-12-14	2017-11-22	Kutupalong	NA	0
2017-12-14	2017-11-22	other	0-4	0
2017-12-14	2017-11-22	other	5-14	0
2017-12-14	2017-11-22	other	15+	0
2017-12-14	2017-11-22	other	NA	0
2017-12-14	2017-11-23	Balukhali	0-4	0
2017-12-14	2017-11-23	Balukhali	5-14	1
2017-12-14	2017-11-23	Balukhali	15+	0
2017-12-14	2017-11-23	Balukhali	NA	0
2017-12-14	2017-11-23	Kutupalong	0-4	0
2017-12-14	2017-11-23	Kutupalong	5-14	0
2017-12-14	2017-11-23	Kutupalong	15+	0
2017-12-14	2017-11-23	Kutupalong	NA	0
2017-12-14	2017-11-23	other	0-4	0
2017-12-14	2017-11-23	other	5-14	2
2017-12-14	2017-11-23	other	15+	0
2017-12-14	2017-11-23	other	NA	0
2017-12-14	2017-11-24	Balukhali	0-4	0
2017-12-14	2017-11-24	Balukhali	5-14	0
2017-12-14	2017-11-24	Balukhali	15+	1
2017-12-14	2017-11-24	Balukhali	NA	0
2017-12-14	2017-11-24	Kutupalong	0-4	0
2017-12-14	2017-11-24	Kutupalong	5-14	0
2017-12-14	2017-11-24	Kutupalong	15+	0
2017-12-14	2017-11-24	Kutupalong	NA	0
2017-12-14	2017-11-24	other	0-4	0
2017-12-14	2017-11-24	other	5-14	0
2017-12-14	2017-11-24	other	15+	1
2017-12-14	2017-11-24	other	NA	0
2017-12-14	2017-11-25	Balukhali	0-4	0
2017-12-14	2017-11-25	Balukhali	5-14	3
2017-12-14	2017-11-25	Balukhali	15+	2
2017-12-14	2017-11-25	Balukhali	NA	0
2017-12-14	2017-11-25	Kutupalong	0-4	0
2017-12-14	2017-11-25	Kutupalong	5-14	1
2017-12-14	2017-11-25	Kutupalong	15+	0
2017-12-14	2017-11-25	Kutupalong	NA	0
2017-12-14	2017-11-25	other	0-4	0
2017-12-14	2017-11-25	other	5-14	2
2017-12-14	2017-11-25	other	15+	0
2017-12-14	2017-11-25	other	NA	0
2017-12-14	2017-11-26	Balukhali	0-4	2
2017-12-14	2017-11-26	Balukhali	5-14	1
2017-12-14	2017-11-26	Balukhali	15+	4
2017-12-14	2017-11-26	Balukhali	NA	0
2017-12-14	2017-11-26	Kutupalong	0-4	0
2017-12-14	2017-11-26	Kutupalong	5-14	0
2017-12-14	2017-11-26	Kutupalong	15+	1
2017-12-14	2017-11-26	Kutupalong	NA	0
2017-12-14	2017-11-26	other	0-4	0
2017-12-14	2017-11-26	other	5-14	0
2017-12-14	2017-11-26	other	15+	0
2017-12-14	2017-11-26	other	NA	0
2017-12-14	2017-11-27	Balukhali	0-4	0
2017-12-14	2017-11-27	Balukhali	5-14	2
2017-12-14	2017-11-27	Balukhali	15+	2
2017-12-14	2017-11-27	Balukhali	NA	0
2017-12-14	2017-11-27	Kutupalong	0-4	0
2017-12-14	2017-11-27	Kutupalong	5-14	0
2017-12-14	2017-11-27	Kutupalong	15+	0
2017-12-14	2017-11-27	Kutupalong	NA	0
2017-12-14	2017-11-27	other	0-4	0
2017-12-14	2017-11-27	other	5-14	0
2017-12-14	2017-11-27	other	15+	0
2017-12-14	2017-11-27	other	NA	0
2017-12-14	2017-11-28	Balukhali	0-4	1
2017-12-14	2017-11-28	Balukhali	5-14	3
2017-12-14	2017-11-28	Balukhali	15+	1
2017-12-14	2017-11-28	Balukhali	NA	0
2017-12-14	2017-11-28	Kutupalong	0-4	0
2017-12-14	2017-11-28	Kutupalong	5-14	1
2017-12-14	2017-11-28	Kutupalong	15+	1
2017-12-14	2017-11-28	Kutupalong	NA	0
2017-12-14	2017-11-28	other	0-4	0
2017-12-14	2017-11-28	other	5-14	0
2017-12-14	2017-11-28	other	15+	0
2017-12-14	2017-11-28	other	NA	0
2017-12-14	2017-11-29	Balukhali	0-4	2
2017-12-14	2017-11-29	Balukhali	5-14	3
2017-12-14	2017-11-29	Balukhali	15+	2
2017-12-14	2017-11-29	Balukhali	NA	0
2017-12-14	2017-11-29	Kutupalong	0-4	1
2017-12-14	2017-11-29	Kutupalong	5-14	1
2017-12-14	2017-11-29	Kutupalong	15+	0
2017-12-14	2017-11-29	Kutupalong	NA	0
2017-12-14	2017-11-29	other	0-4	1
2017-12-14	2017-11-29	other	5-14	0
2017-12-14	2017-11-29	other	15+	0
2017-12-14	2017-11-29	other	NA	0
2017-12-14	2017-11-30	Balukhali	0-4	3
2017-12-14	2017-11-30	Balukhali	5-14	6
2017-12-14	2017-11-30	Balukhali	15+	4
2017-12-14	2017-11-30	Balukhali	NA	0
2017-12-14	2017-11-30	Kutupalong	0-4	0
2017-12-14	2017-11-30	Kutupalong	5-14	2
2017-12-14	2017-11-30	Kutupalong	15+	3
2017-12-14	2017-11-30	Kutupalong	NA	0
2017-12-14	2017-11-30	other	0-4	1
2017-12-14	2017-11-30	other	5-14	1
2017-12-14	2017-11-30	other	15+	0
2017-12-14	2017-11-30	other	NA	0
2017-12-14	2017-12-01	Balukhali	0-4	2
2017-12-14	2017-12-01	Balukhali	5-14	10
2017-12-14	2017-12-01	Balukhali	15+	12
2017-12-14	2017-12-01	Balukhali	NA	0
2017-12-14	2017-12-01	Kutupalong	0-4	3
2017-12-14	2017-12-01	Kutupalong	5-14	0
2017-12-14	2017-12-01	Kutupalong	15+	1
2017-12-14	2017-12-01	Kutupalong	NA	0
2017-12-14	2017-12-01	other	0-4	0
2017-12-14	2017-12-01	other	5-14	2
2017-12-14	2017-12-01	other	15+	1
2017-12-14	2017-12-01	other	NA	0
2017-12-14	2017-12-02	Balukhali	0-4	2
2017-12-14	2017-12-02	Balukhali	5-14	12
2017-12-14	2017-12-02	Balukhali	15+	7
2017-12-14	2017-12-02	Balukhali	NA	0
2017-12-14	2017-12-02	Kutupalong	0-4	3
2017-12-14	2017-12-02	Kutupalong	5-14	6
2017-12-14	2017-12-02	Kutupalong	15+	1
2017-12-14	2017-12-02	Kutupalong	NA	0
2017-12-14	2017-12-02	other	0-4	1
2017-12-14	2017-12-02	other	5-14	2
2017-12-14	2017-12-02	other	15+	1
2017-12-14	2017-12-02	other	NA	0
2017-12-14	2017-12-03	Balukhali	0-4	7
2017-12-14	2017-12-03	Balukhali	5-14	31
2017-12-14	2017-12-03	Balukhali	15+	11
2017-12-14	2017-12-03	Balukhali	NA	0
2017-12-14	2017-12-03	Kutupalong	0-4	5
2017-12-14	2017-12-03	Kutupalong	5-14	12
2017-12-14	2017-12-03	Kutupalong	15+	4
2017-12-14	2017-12-03	Kutupalong	NA	1
2017-12-14	2017-12-03	other	0-4	2
2017-12-14	2017-12-03	other	5-14	5
2017-12-14	2017-12-03	other	15+	1
2017-12-14	2017-12-03	other	NA	0
2017-12-14	2017-12-04	Balukhali	0-4	1
2017-12-14	2017-12-04	Balukhali	5-14	19
2017-12-14	2017-12-04	Balukhali	15+	10
2017-12-14	2017-12-04	Balukhali	NA	0
2017-12-14	2017-12-04	Kutupalong	0-4	5
2017-12-14	2017-12-04	Kutupalong	5-14	15
2017-12-14	2017-12-04	Kutupalong	15+	1
2017-12-14	2017-12-04	Kutupalong	NA	0
2017-12-14	2017-12-04	other	0-4	0
2017-12-14	2017-12-04	other	5-14	6
2017-12-14	2017-12-04	other	15+	1
2017-12-14	2017-12-04	other	NA	0
2017-12-14	2017-12-05	Balukhali	0-4	6
2017-12-14	2017-12-05	Balukhali	5-14	28
2017-12-14	2017-12-05	Balukhali	15+	20
2017-12-14	2017-12-05	Balukhali	NA	0
2017-12-14	2017-12-05	Kutupalong	0-4	2
2017-12-14	2017-12-05	Kutupalong	5-14	11
2017-12-14	2017-12-05	Kutupalong	15+	6
2017-12-14	2017-12-05	Kutupalong	NA	0
2017-12-14	2017-12-05	other	0-4	2
2017-12-14	2017-12-05	other	5-14	2
2017-12-14	2017-12-05	other	15+	3
2017-12-14	2017-12-05	other	NA	0
2017-12-14	2017-12-06	Balukhali	0-4	13
2017-12-14	2017-12-06	Balukhali	5-14	41
2017-12-14	2017-12-06	Balukhali	15+	18
2017-12-14	2017-12-06	Balukhali	NA	0
2017-12-14	2017-12-06	Kutupalong	0-4	2
2017-12-14	2017-12-06	Kutupalong	5-14	14
2017-12-14	2017-12-06	Kutupalong	15+	10
2017-12-14	2017-12-06	Kutupalong	NA	0
2017-12-14	2017-12-06	other	0-4	2
2017-12-14	2017-12-06	other	5-14	7
2017-12-14	2017-12-06	other	15+	2
2017-12-14	2017-12-06	other	NA	0
2017-12-14	2017-12-07	Balukhali	0-4	8
2017-12-14	2017-12-07	Balukhali	5-14	44
2017-12-14	2017-12-07	Balukhali	15+	26
2017-12-14	2017-12-07	Balukhali	NA	0
2017-12-14	2017-12-07	Kutupalong	0-4	5
2017-12-14	2017-12-07	Kutupalong	5-14	20
2017-12-14	2017-12-07	Kutupalong	15+	4
2017-12-14	2017-12-07	Kutupalong	NA	0
2017-12-14	2017-12-07	other	0-4	2
2017-12-14	2017-12-07	other	5-14	8
2017-12-14	2017-12-07	other	15+	1
2017-12-14	2017-12-07	other	NA	0
2017-12-14	2017-12-08	Balukhali	0-4	12
2017-12-14	2017-12-08	Balukhali	5-14	38
2017-12-14	2017-12-08	Balukhali	15+	22
2017-12-14	2017-12-08	Balukhali	NA	0
2017-12-14	2017-12-08	Kutupalong	0-4	3
2017-12-14	2017-12-08	Kutupalong	5-14	9
2017-12-14	2017-12-08	Kutupalong	15+	9
2017-12-14	2017-12-08	Kutupalong	NA	0
2017-12-14	2017-12-08	other	0-4	3
2017-12-14	2017-12-08	other	5-14	2
2017-12-14	2017-12-08	other	15+	5
2017-12-14	2017-12-08	other	NA	0
2017-12-14	2017-12-09	Balukhali	0-4	11
2017-12-14	2017-12-09	Balukhali	5-14	37
2017-12-14	2017-12-09	Balukhali	15+	15
2017-12-14	2017-12-09	Balukhali	NA	0
2017-12-14	2017-12-09	Kutupalong	0-4	9
2017-12-14	2017-12-09	Kutupalong	5-14	9
2017-12-14	2017-12-09	Kutupalong	15+	8
2017-12-14	2017-12-09	Kutupalong	NA	0
2017-12-14	2017-12-09	other	0-4	3
2017-12-14	2017-12-09	other	5-14	5
2017-12-14	2017-12-09	other	15+	0
2017-12-14	2017-12-09	other	NA	0
2017-12-14	2017-12-10	Balukhali	0-4	8
2017-12-14	2017-12-10	Balukhali	5-14	53
2017-12-14	2017-12-10	Balukhali	15+	12
2017-12-14	2017-12-10	Balukhali	NA	0
2017-12-14	2017-12-10	Kutupalong	0-4	3
2017-12-14	2017-12-10	Kutupalong	5-14	13
2017-12-14	2017-12-10	Kutupalong	15+	9
2017-12-14	2017-12-10	Kutupalong	NA	0
2017-12-14	2017-12-10	other	0-4	2
2017-12-14	2017-12-10	other	5-14	4
2017-12-14	2017-12-10	other	15+	7
2017-12-14	2017-12-10	other	NA	0
2017-12-14	2017-12-11	Balukhali	0-4	5
2017-12-14	2017-12-11	Balukhali	5-14	37
2017-12-14	2017-12-11	Balukhali	15+	11
2017-12-14	2017-12-11	Balukhali	NA	0
2017-12-14	2017-12-11	Kutupalong	0-4	2
2017-12-14	2017-12-11	Kutupalong	5-14	5
2017-12-14	2017-12-11	Kutupalong	15+	2
2017-12-14	2017-12-11	Kutupalong	NA	0
2017-12-14	2017-12-11	other	0-4	0
2017-12-14	2017-12-11	other	5-14	3
2017-12-14	2017-12-11	other	15+	3
2017-12-14	2017-12-11	other	NA	0
2017-12-14	2017-12-12	Balukhali	0-4	3
2017-12-14	2017-12-12	Balukhali	5-14	34
2017-12-14	2017-12-12	Balukhali	15+	15
2017-12-14	2017-12-12	Balukhali	NA	0
2017-12-14	2017-12-12	Kutupalong	0-4	1
2017-12-14	2017-12-12	Kutupalong	5-14	2
2017-12-14	2017-12-12	Kutupalong	15+	1
2017-12-14	2017-12-12	Kutupalong	NA	0
2017-12-14	2017-12-12	other	0-4	2
2017-12-14	2017-12-12	other	5-14	2
2017-12-14	2017-12-12	other	15+	2
2017-12-14	2017-12-12	other	NA	0
2017-12-14	2017-12-13	Balukhali	0-4	4
2017-12-14	2017-12-13	Balukhali	5-14	24
2017-12-14	2017-12-13	Balukhali	15+	6
2017-12-14	2017-12-13	Balukhali	NA	0
2017-12-14	2017-12-13	Kutupalong	0-4	0
2017-12-14	2017-12-13	Kutupalong	5-14	2
2017-12-14	2017-12-13	Kutupalong	15+	1
2017-12-14	2017-12-13	Kutupalong	NA	0
2017-12-14	2017-12-13	other	0-4	0
2017-12-14	2017-12-13	other	5-14	2
2017-12-14	2017-12-13	other	15+	0
2017-12-14	2017-12-13	other	NA	0
2017-12-14	2017-12-14	Balukhali	0-4	0
2017-12-14	2017-12-14	Balukhali	5-14	8
2017-12-14	2017-12-14	Balukhali	15+	1
2017-12-14	2017-12-14	Balukhali	NA	0
2017-12-14	2017-12-14	Kutupalong	0-4	0
2017-12-14	2017-12-14	Kutupalong	5-14	0
2017-12-14	2017-12-14	Kutupalong	15+	0
2017-12-14	2017-12-14	Kutupalong	NA	0
2017-12-14	2017-12-14	other	0-4	0
2017-12-14	2017-12-14	other	5-14	0
2017-12-14	2017-12-14	other	15+	0
2017-12-14	2017-12-14	other	NA	0
2017-12-15	2017-11-08	Balukhali	0-4	0
2017-12-15	2017-11-08	Balukhali	5-14	0
2017-12-15	2017-11-08	Balukhali	15+	1
2017-12-15	2017-11-08	Balukhali	NA	0
2017-12-15	2017-11-08	Kutupalong	0-4	0
2017-12-15	2017-11-08	Kutupalong	5-14	0
2017-12-15	2017-11-08	Kutupalong	15+	0
2017-12-15	2017-11-08	Kutupalong	NA	0
2017-12-15	2017-11-08	other	0-4	0
2017-12-15	2017-11-08	other	5-14	0
2017-12-15	2017-11-08	other	15+	0
2017-12-15	2017-11-08	other	NA	0
2017-12-15	2017-11-09	Balukhali	0-4	0
2017-12-15	2017-11-09	Balukhali	5-14	0
2017-12-15	2017-11-09	Balukhali	15+	0
2017-12-15	2017-11-09	Balukhali	NA	0
2017-12-15	2017-11-09	Kutupalong	0-4	0
2017-12-15	2017-11-09	Kutupalong	5-14	0
2017-12-15	2017-11-09	Kutupalong	15+	0
2017-12-15	2017-11-09	Kutupalong	NA	0
2017-12-15	2017-11-09	other	0-4	0
2017-12-15	2017-11-09	other	5-14	0
2017-12-15	2017-11-09	other	15+	0
2017-12-15	2017-11-09	other	NA	0
2017-12-15	2017-11-10	Balukhali	0-4	0
2017-12-15	2017-11-10	Balukhali	5-14	0
2017-12-15	2017-11-10	Balukhali	15+	0
2017-12-15	2017-11-10	Balukhali	NA	0
2017-12-15	2017-11-10	Kutupalong	0-4	0
2017-12-15	2017-11-10	Kutupalong	5-14	0
2017-12-15	2017-11-10	Kutupalong	15+	0
2017-12-15	2017-11-10	Kutupalong	NA	0
2017-12-15	2017-11-10	other	0-4	0
2017-12-15	2017-11-10	other	5-14	0
2017-12-15	2017-11-10	other	15+	0
2017-12-15	2017-11-10	other	NA	0
2017-12-15	2017-11-11	Balukhali	0-4	0
2017-12-15	2017-11-11	Balukhali	5-14	0
2017-12-15	2017-11-11	Balukhali	15+	0
2017-12-15	2017-11-11	Balukhali	NA	0
2017-12-15	2017-11-11	Kutupalong	0-4	0
2017-12-15	2017-11-11	Kutupalong	5-14	0
2017-12-15	2017-11-11	Kutupalong	15+	0
2017-12-15	2017-11-11	Kutupalong	NA	0
2017-12-15	2017-11-11	other	0-4	0
2017-12-15	2017-11-11	other	5-14	0
2017-12-15	2017-11-11	other	15+	0
2017-12-15	2017-11-11	other	NA	0
2017-12-15	2017-11-12	Balukhali	0-4	0
2017-12-15	2017-11-12	Balukhali	5-14	0
2017-12-15	2017-11-12	Balukhali	15+	0
2017-12-15	2017-11-12	Balukhali	NA	0
2017-12-15	2017-11-12	Kutupalong	0-4	0
2017-12-15	2017-11-12	Kutupalong	5-14	1
2017-12-15	2017-11-12	Kutupalong	15+	0
2017-12-15	2017-11-12	Kutupalong	NA	0
2017-12-15	2017-11-12	other	0-4	0
2017-12-15	2017-11-12	other	5-14	0
2017-12-15	2017-11-12	other	15+	0
2017-12-15	2017-11-12	other	NA	0
2017-12-15	2017-11-13	Balukhali	0-4	0
2017-12-15	2017-11-13	Balukhali	5-14	0
2017-12-15	2017-11-13	Balukhali	15+	0
2017-12-15	2017-11-13	Balukhali	NA	0
2017-12-15	2017-11-13	Kutupalong	0-4	0
2017-12-15	2017-11-13	Kutupalong	5-14	0
2017-12-15	2017-11-13	Kutupalong	15+	0
2017-12-15	2017-11-13	Kutupalong	NA	0
2017-12-15	2017-11-13	other	0-4	0
2017-12-15	2017-11-13	other	5-14	0
2017-12-15	2017-11-13	other	15+	0
2017-12-15	2017-11-13	other	NA	0
2017-12-15	2017-11-14	Balukhali	0-4	0
2017-12-15	2017-11-14	Balukhali	5-14	0
2017-12-15	2017-11-14	Balukhali	15+	0
2017-12-15	2017-11-14	Balukhali	NA	0
2017-12-15	2017-11-14	Kutupalong	0-4	0
2017-12-15	2017-11-14	Kutupalong	5-14	0
2017-12-15	2017-11-14	Kutupalong	15+	0
2017-12-15	2017-11-14	Kutupalong	NA	0
2017-12-15	2017-11-14	other	0-4	0
2017-12-15	2017-11-14	other	5-14	0
2017-12-15	2017-11-14	other	15+	0
2017-12-15	2017-11-14	other	NA	0
2017-12-15	2017-11-15	Balukhali	0-4	0
2017-12-15	2017-11-15	Balukhali	5-14	0
2017-12-15	2017-11-15	Balukhali	15+	0
2017-12-15	2017-11-15	Balukhali	NA	0
2017-12-15	2017-11-15	Kutupalong	0-4	0
2017-12-15	2017-11-15	Kutupalong	5-14	1
2017-12-15	2017-11-15	Kutupalong	15+	0
2017-12-15	2017-11-15	Kutupalong	NA	0
2017-12-15	2017-11-15	other	0-4	0
2017-12-15	2017-11-15	other	5-14	0
2017-12-15	2017-11-15	other	15+	0
2017-12-15	2017-11-15	other	NA	0
2017-12-15	2017-11-16	Balukhali	0-4	1
2017-12-15	2017-11-16	Balukhali	5-14	0
2017-12-15	2017-11-16	Balukhali	15+	0
2017-12-15	2017-11-16	Balukhali	NA	0
2017-12-15	2017-11-16	Kutupalong	0-4	0
2017-12-15	2017-11-16	Kutupalong	5-14	0
2017-12-15	2017-11-16	Kutupalong	15+	0
2017-12-15	2017-11-16	Kutupalong	NA	0
2017-12-15	2017-11-16	other	0-4	0
2017-12-15	2017-11-16	other	5-14	0
2017-12-15	2017-11-16	other	15+	0
2017-12-15	2017-11-16	other	NA	0
2017-12-15	2017-11-17	Balukhali	0-4	0
2017-12-15	2017-11-17	Balukhali	5-14	0
2017-12-15	2017-11-17	Balukhali	15+	0
2017-12-15	2017-11-17	Balukhali	NA	0
2017-12-15	2017-11-17	Kutupalong	0-4	0
2017-12-15	2017-11-17	Kutupalong	5-14	0
2017-12-15	2017-11-17	Kutupalong	15+	0
2017-12-15	2017-11-17	Kutupalong	NA	0
2017-12-15	2017-11-17	other	0-4	0
2017-12-15	2017-11-17	other	5-14	0
2017-12-15	2017-11-17	other	15+	0
2017-12-15	2017-11-17	other	NA	0
2017-12-15	2017-11-18	Balukhali	0-4	0
2017-12-15	2017-11-18	Balukhali	5-14	0
2017-12-15	2017-11-18	Balukhali	15+	0
2017-12-15	2017-11-18	Balukhali	NA	0
2017-12-15	2017-11-18	Kutupalong	0-4	0
2017-12-15	2017-11-18	Kutupalong	5-14	0
2017-12-15	2017-11-18	Kutupalong	15+	0
2017-12-15	2017-11-18	Kutupalong	NA	0
2017-12-15	2017-11-18	other	0-4	0
2017-12-15	2017-11-18	other	5-14	0
2017-12-15	2017-11-18	other	15+	0
2017-12-15	2017-11-18	other	NA	0
2017-12-15	2017-11-19	Balukhali	0-4	0
2017-12-15	2017-11-19	Balukhali	5-14	0
2017-12-15	2017-11-19	Balukhali	15+	0
2017-12-15	2017-11-19	Balukhali	NA	0
2017-12-15	2017-11-19	Kutupalong	0-4	0
2017-12-15	2017-11-19	Kutupalong	5-14	0
2017-12-15	2017-11-19	Kutupalong	15+	0
2017-12-15	2017-11-19	Kutupalong	NA	0
2017-12-15	2017-11-19	other	0-4	0
2017-12-15	2017-11-19	other	5-14	0
2017-12-15	2017-11-19	other	15+	0
2017-12-15	2017-11-19	other	NA	0
2017-12-15	2017-11-20	Balukhali	0-4	1
2017-12-15	2017-11-20	Balukhali	5-14	0
2017-12-15	2017-11-20	Balukhali	15+	3
2017-12-15	2017-11-20	Balukhali	NA	0
2017-12-15	2017-11-20	Kutupalong	0-4	0
2017-12-15	2017-11-20	Kutupalong	5-14	0
2017-12-15	2017-11-20	Kutupalong	15+	0
2017-12-15	2017-11-20	Kutupalong	NA	0
2017-12-15	2017-11-20	other	0-4	0
2017-12-15	2017-11-20	other	5-14	0
2017-12-15	2017-11-20	other	15+	0
2017-12-15	2017-11-20	other	NA	0
2017-12-15	2017-11-21	Balukhali	0-4	0
2017-12-15	2017-11-21	Balukhali	5-14	0
2017-12-15	2017-11-21	Balukhali	15+	0
2017-12-15	2017-11-21	Balukhali	NA	0
2017-12-15	2017-11-21	Kutupalong	0-4	0
2017-12-15	2017-11-21	Kutupalong	5-14	0
2017-12-15	2017-11-21	Kutupalong	15+	0
2017-12-15	2017-11-21	Kutupalong	NA	0
2017-12-15	2017-11-21	other	0-4	0
2017-12-15	2017-11-21	other	5-14	0
2017-12-15	2017-11-21	other	15+	0
2017-12-15	2017-11-21	other	NA	0
2017-12-15	2017-11-22	Balukhali	0-4	0
2017-12-15	2017-11-22	Balukhali	5-14	1
2017-12-15	2017-11-22	Balukhali	15+	0
2017-12-15	2017-11-22	Balukhali	NA	0
2017-12-15	2017-11-22	Kutupalong	0-4	0
2017-12-15	2017-11-22	Kutupalong	5-14	0
2017-12-15	2017-11-22	Kutupalong	15+	0
2017-12-15	2017-11-22	Kutupalong	NA	0
2017-12-15	2017-11-22	other	0-4	0
2017-12-15	2017-11-22	other	5-14	0
2017-12-15	2017-11-22	other	15+	0
2017-12-15	2017-11-22	other	NA	0
2017-12-15	2017-11-23	Balukhali	0-4	0
2017-12-15	2017-11-23	Balukhali	5-14	1
2017-12-15	2017-11-23	Balukhali	15+	0
2017-12-15	2017-11-23	Balukhali	NA	0
2017-12-15	2017-11-23	Kutupalong	0-4	0
2017-12-15	2017-11-23	Kutupalong	5-14	0
2017-12-15	2017-11-23	Kutupalong	15+	0
2017-12-15	2017-11-23	Kutupalong	NA	0
2017-12-15	2017-11-23	other	0-4	0
2017-12-15	2017-11-23	other	5-14	2
2017-12-15	2017-11-23	other	15+	0
2017-12-15	2017-11-23	other	NA	0
2017-12-15	2017-11-24	Balukhali	0-4	0
2017-12-15	2017-11-24	Balukhali	5-14	0
2017-12-15	2017-11-24	Balukhali	15+	1
2017-12-15	2017-11-24	Balukhali	NA	0
2017-12-15	2017-11-24	Kutupalong	0-4	0
2017-12-15	2017-11-24	Kutupalong	5-14	0
2017-12-15	2017-11-24	Kutupalong	15+	0
2017-12-15	2017-11-24	Kutupalong	NA	0
2017-12-15	2017-11-24	other	0-4	0
2017-12-15	2017-11-24	other	5-14	0
2017-12-15	2017-11-24	other	15+	1
2017-12-15	2017-11-24	other	NA	0
2017-12-15	2017-11-25	Balukhali	0-4	0
2017-12-15	2017-11-25	Balukhali	5-14	3
2017-12-15	2017-11-25	Balukhali	15+	2
2017-12-15	2017-11-25	Balukhali	NA	0
2017-12-15	2017-11-25	Kutupalong	0-4	0
2017-12-15	2017-11-25	Kutupalong	5-14	1
2017-12-15	2017-11-25	Kutupalong	15+	0
2017-12-15	2017-11-25	Kutupalong	NA	0
2017-12-15	2017-11-25	other	0-4	0
2017-12-15	2017-11-25	other	5-14	2
2017-12-15	2017-11-25	other	15+	0
2017-12-15	2017-11-25	other	NA	0
2017-12-15	2017-11-26	Balukhali	0-4	2
2017-12-15	2017-11-26	Balukhali	5-14	1
2017-12-15	2017-11-26	Balukhali	15+	4
2017-12-15	2017-11-26	Balukhali	NA	0
2017-12-15	2017-11-26	Kutupalong	0-4	0
2017-12-15	2017-11-26	Kutupalong	5-14	0
2017-12-15	2017-11-26	Kutupalong	15+	1
2017-12-15	2017-11-26	Kutupalong	NA	0
2017-12-15	2017-11-26	other	0-4	0
2017-12-15	2017-11-26	other	5-14	0
2017-12-15	2017-11-26	other	15+	0
2017-12-15	2017-11-26	other	NA	0
2017-12-15	2017-11-27	Balukhali	0-4	0
2017-12-15	2017-11-27	Balukhali	5-14	2
2017-12-15	2017-11-27	Balukhali	15+	2
2017-12-15	2017-11-27	Balukhali	NA	0
2017-12-15	2017-11-27	Kutupalong	0-4	0
2017-12-15	2017-11-27	Kutupalong	5-14	0
2017-12-15	2017-11-27	Kutupalong	15+	0
2017-12-15	2017-11-27	Kutupalong	NA	0
2017-12-15	2017-11-27	other	0-4	0
2017-12-15	2017-11-27	other	5-14	0
2017-12-15	2017-11-27	other	15+	0
2017-12-15	2017-11-27	other	NA	0
2017-12-15	2017-11-28	Balukhali	0-4	1
2017-12-15	2017-11-28	Balukhali	5-14	3
2017-12-15	2017-11-28	Balukhali	15+	1
2017-12-15	2017-11-28	Balukhali	NA	0
[truncated: 15,716 more rows]
